# Supplementary material
Source: PubMed Central journal article supplement (PMC1502303)

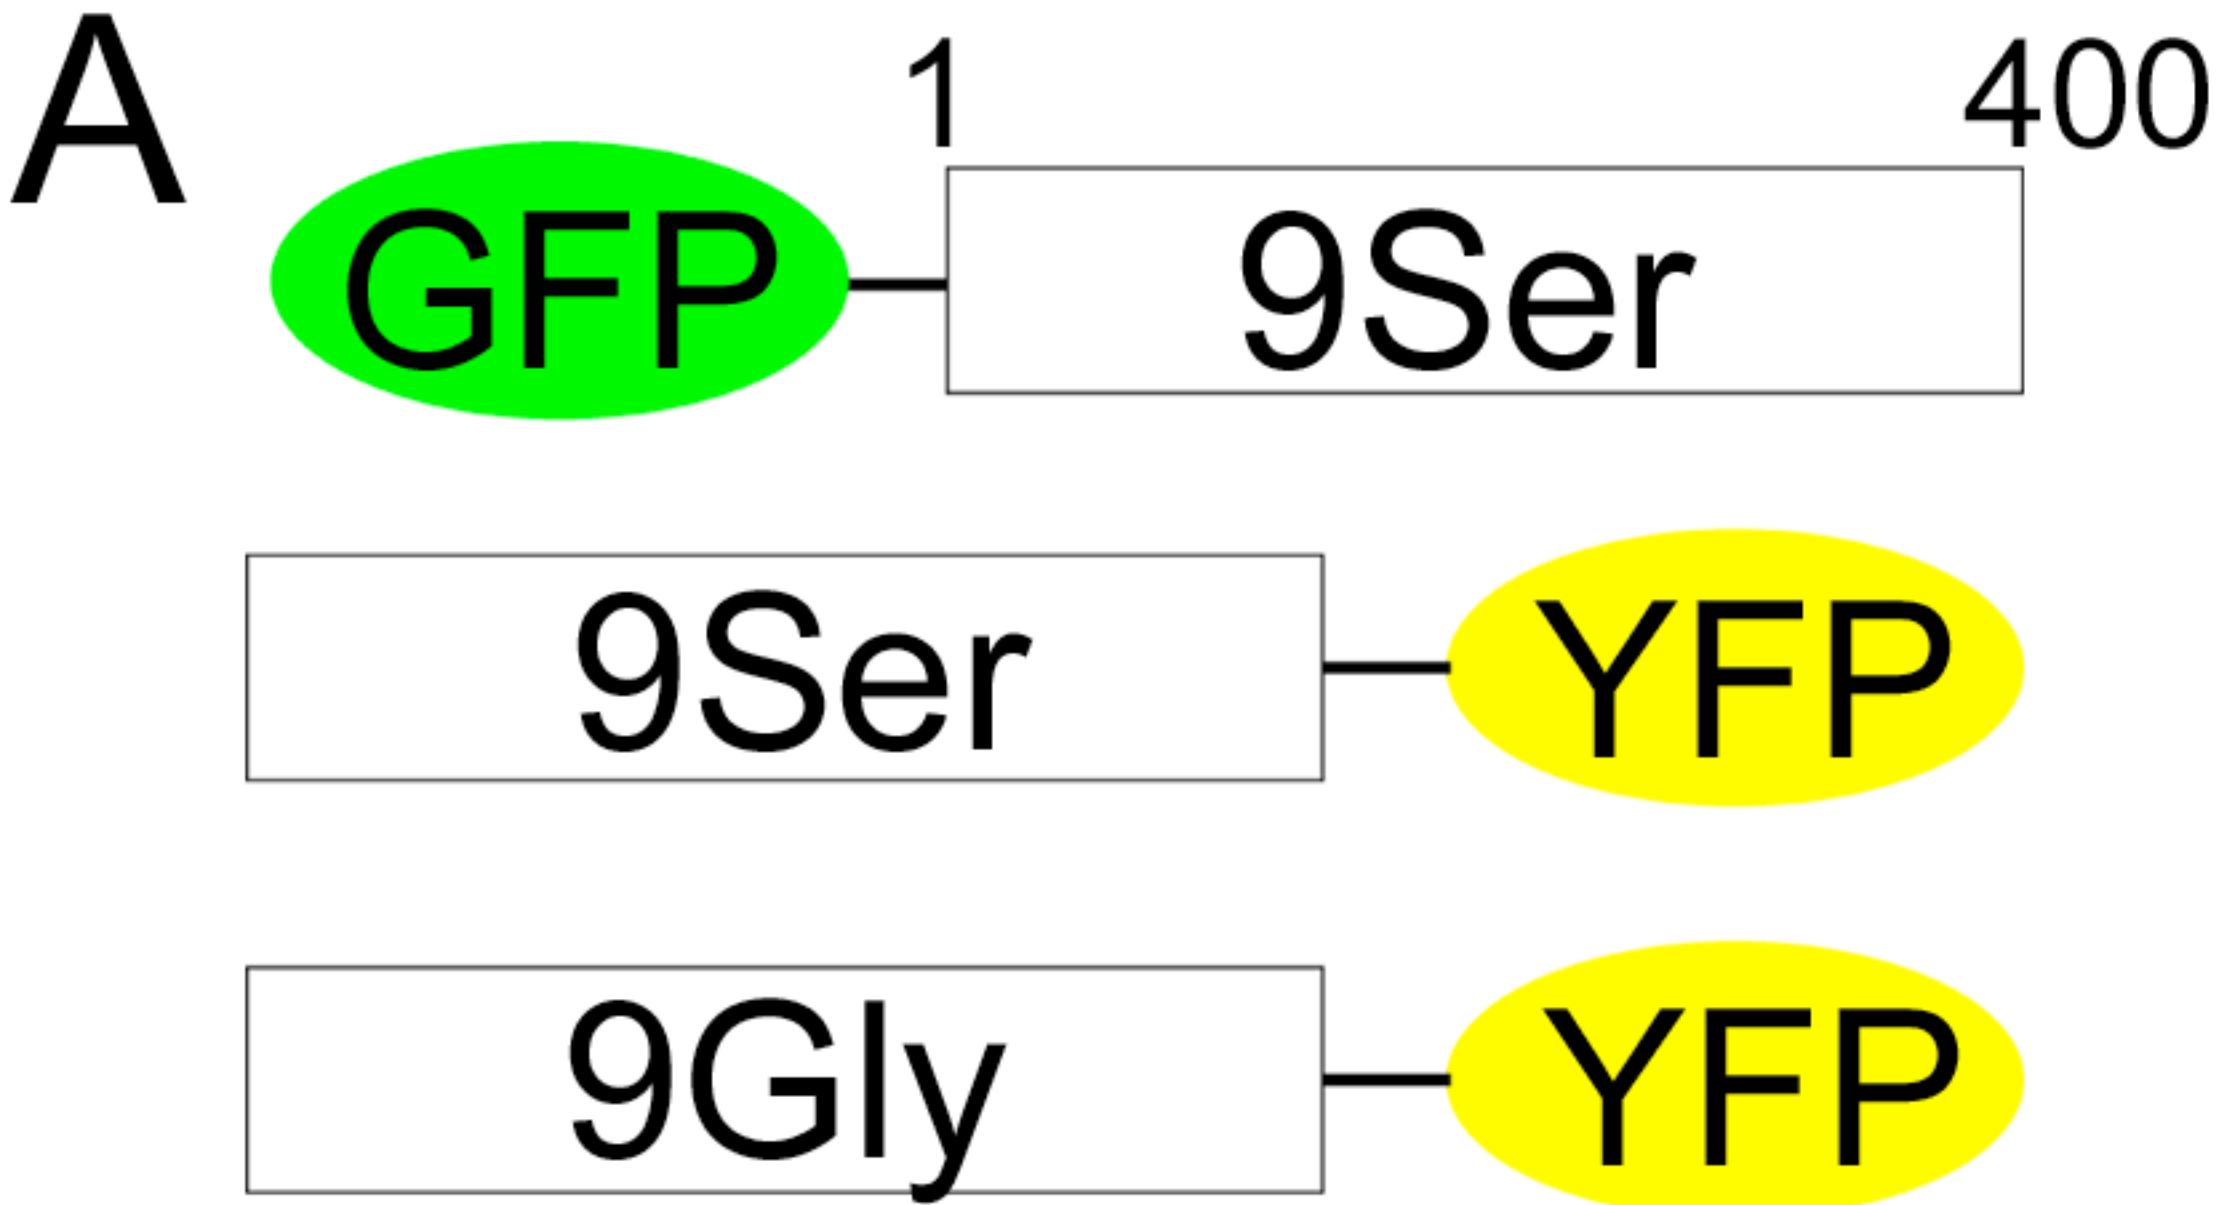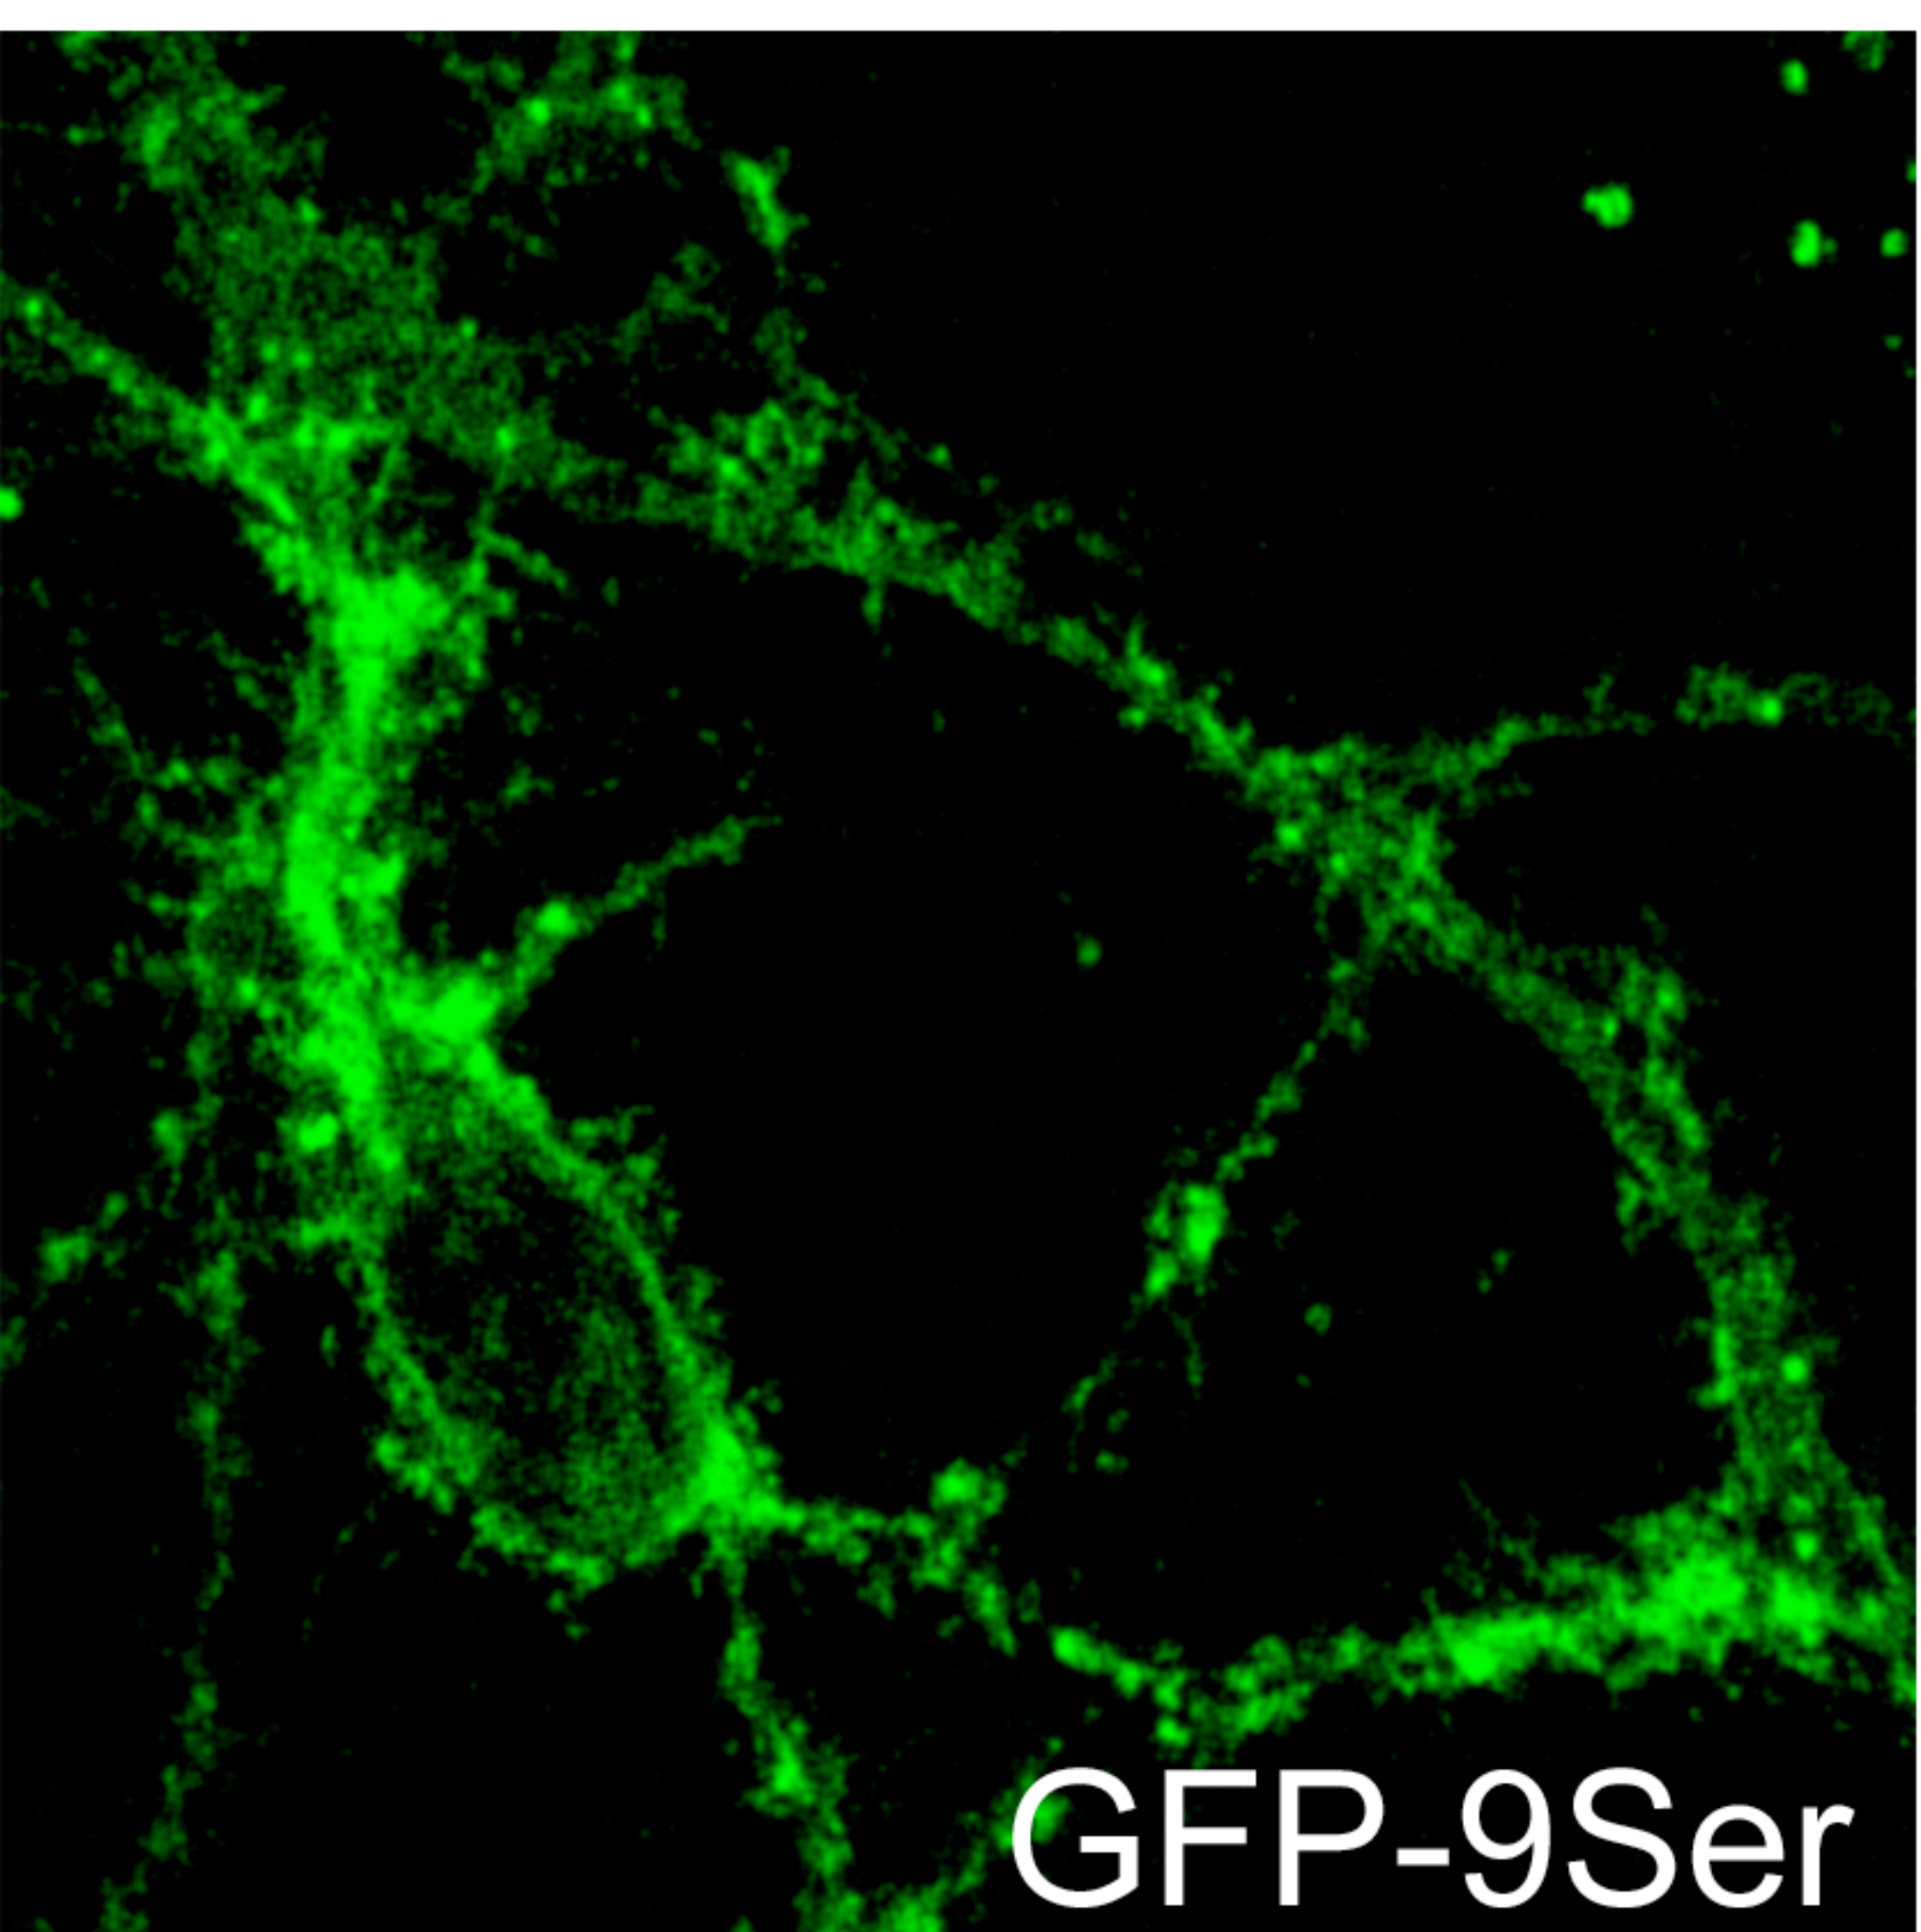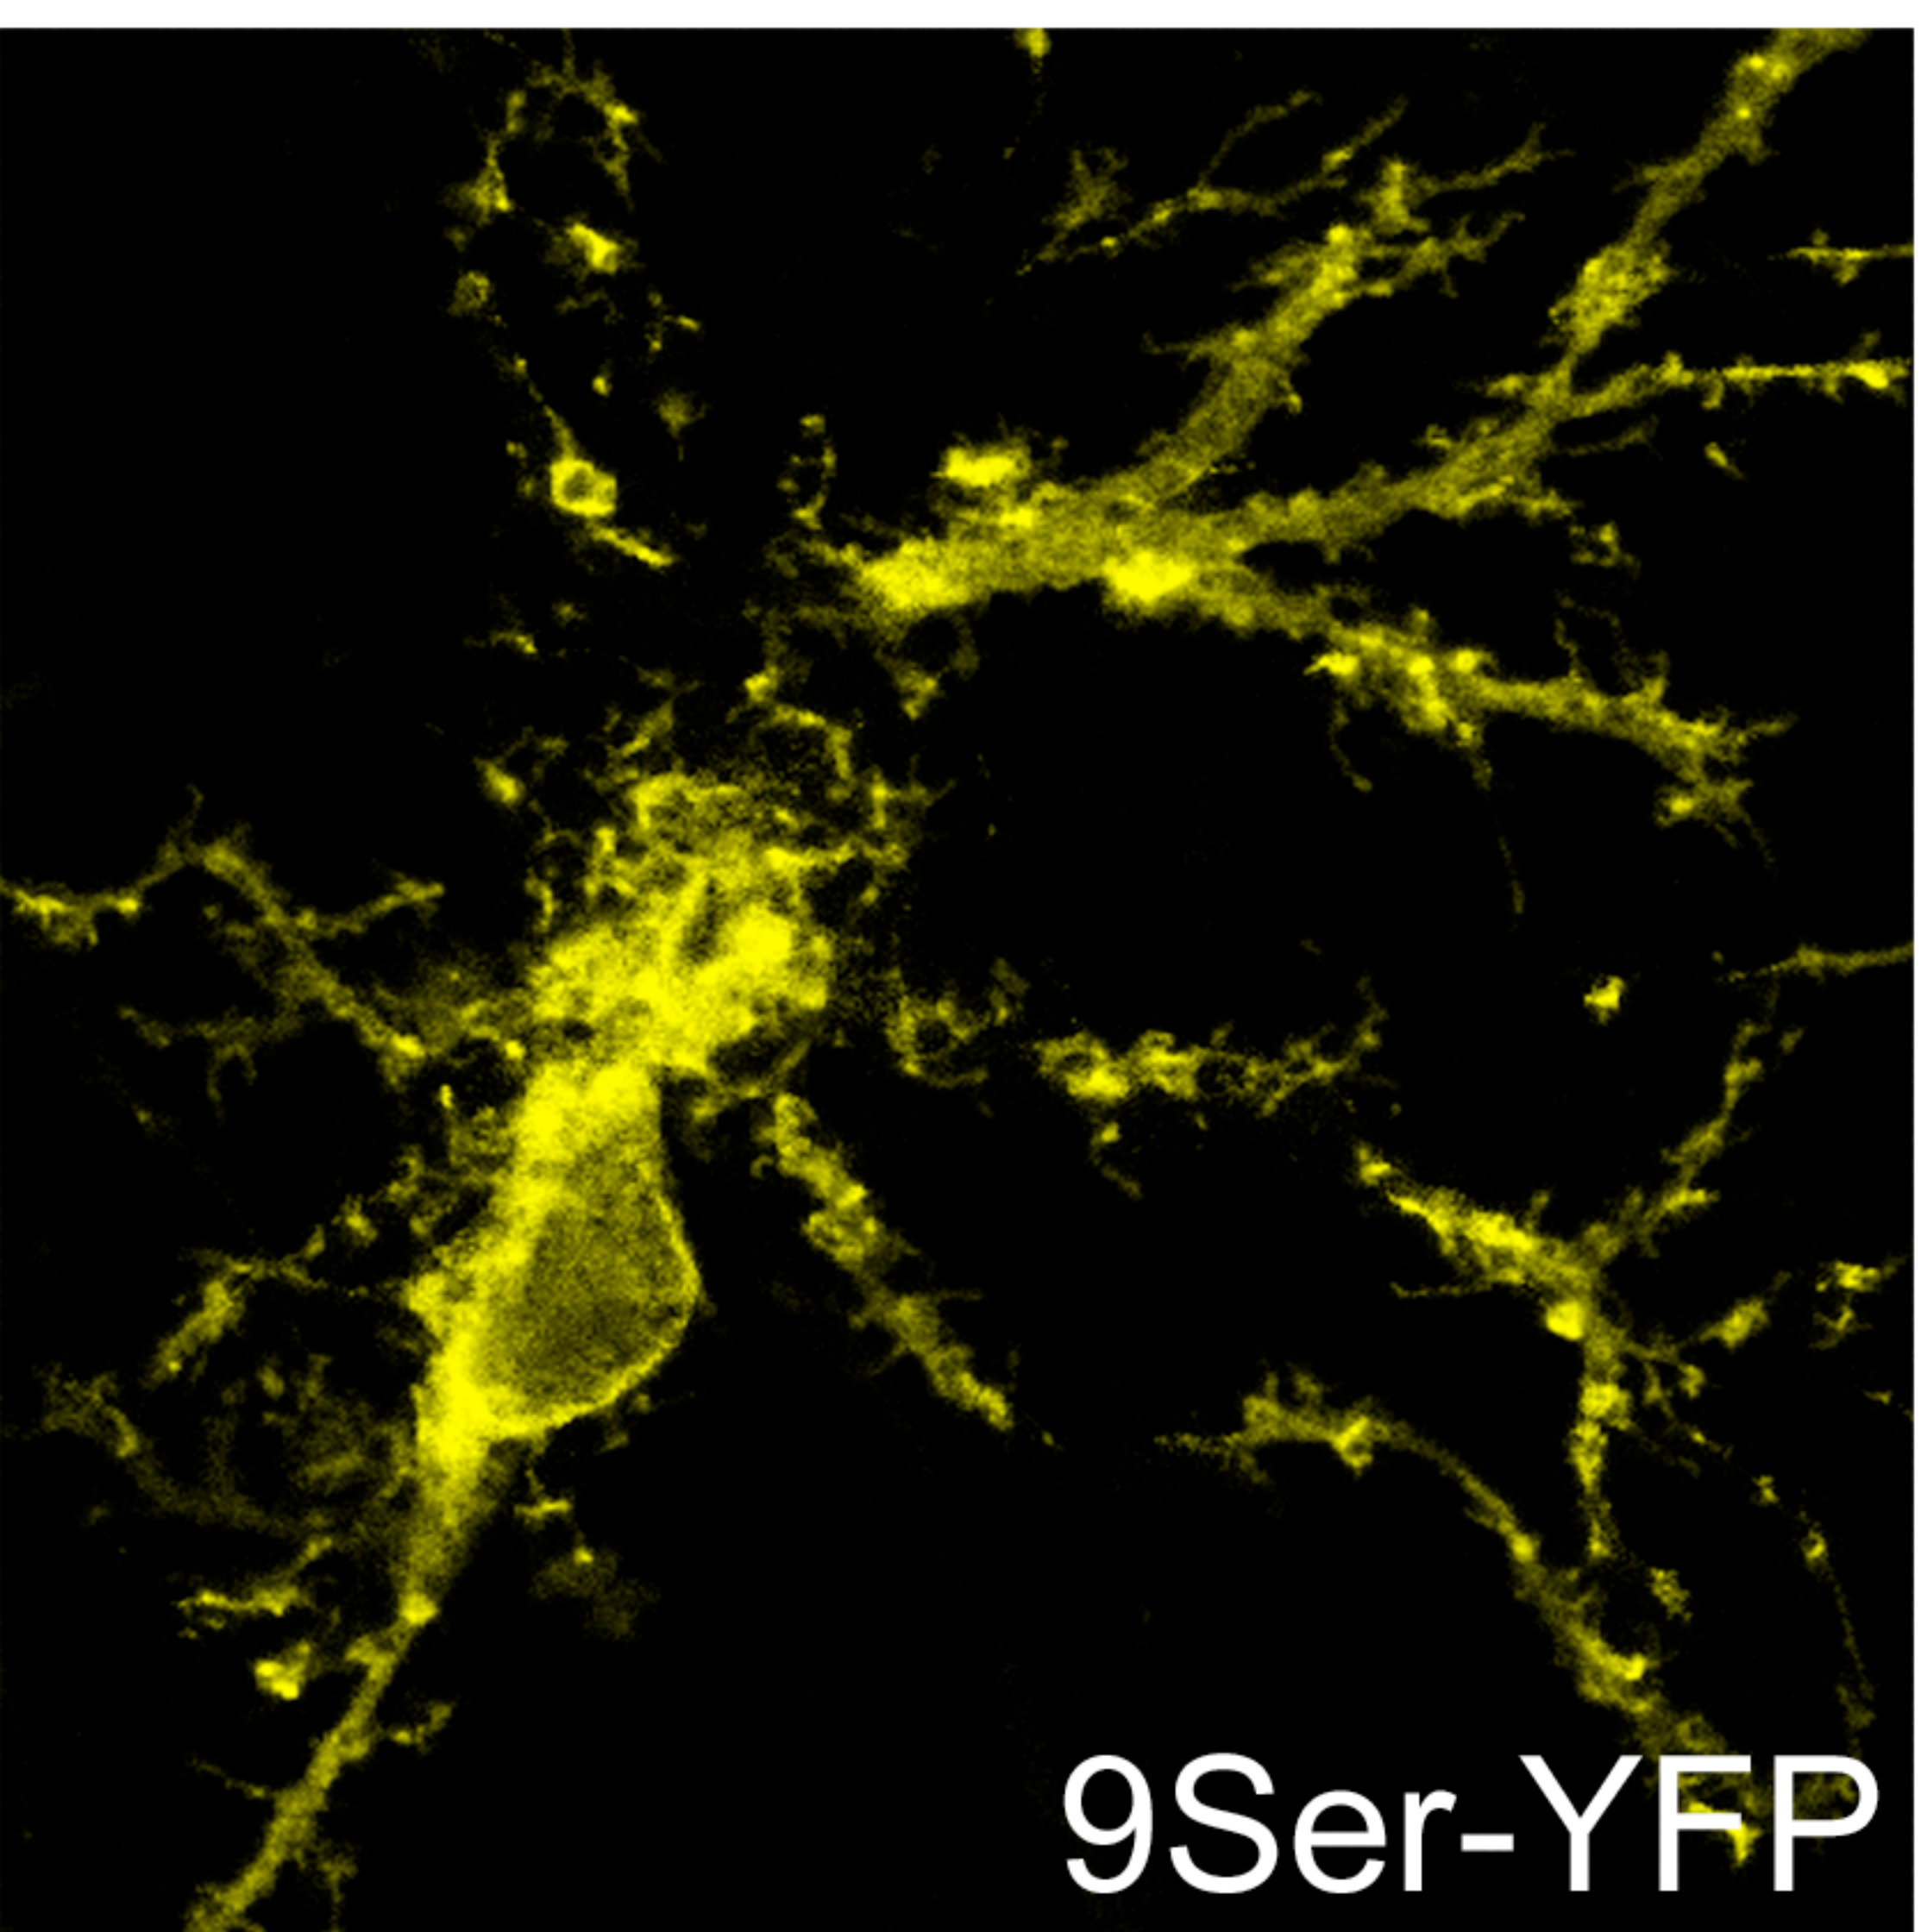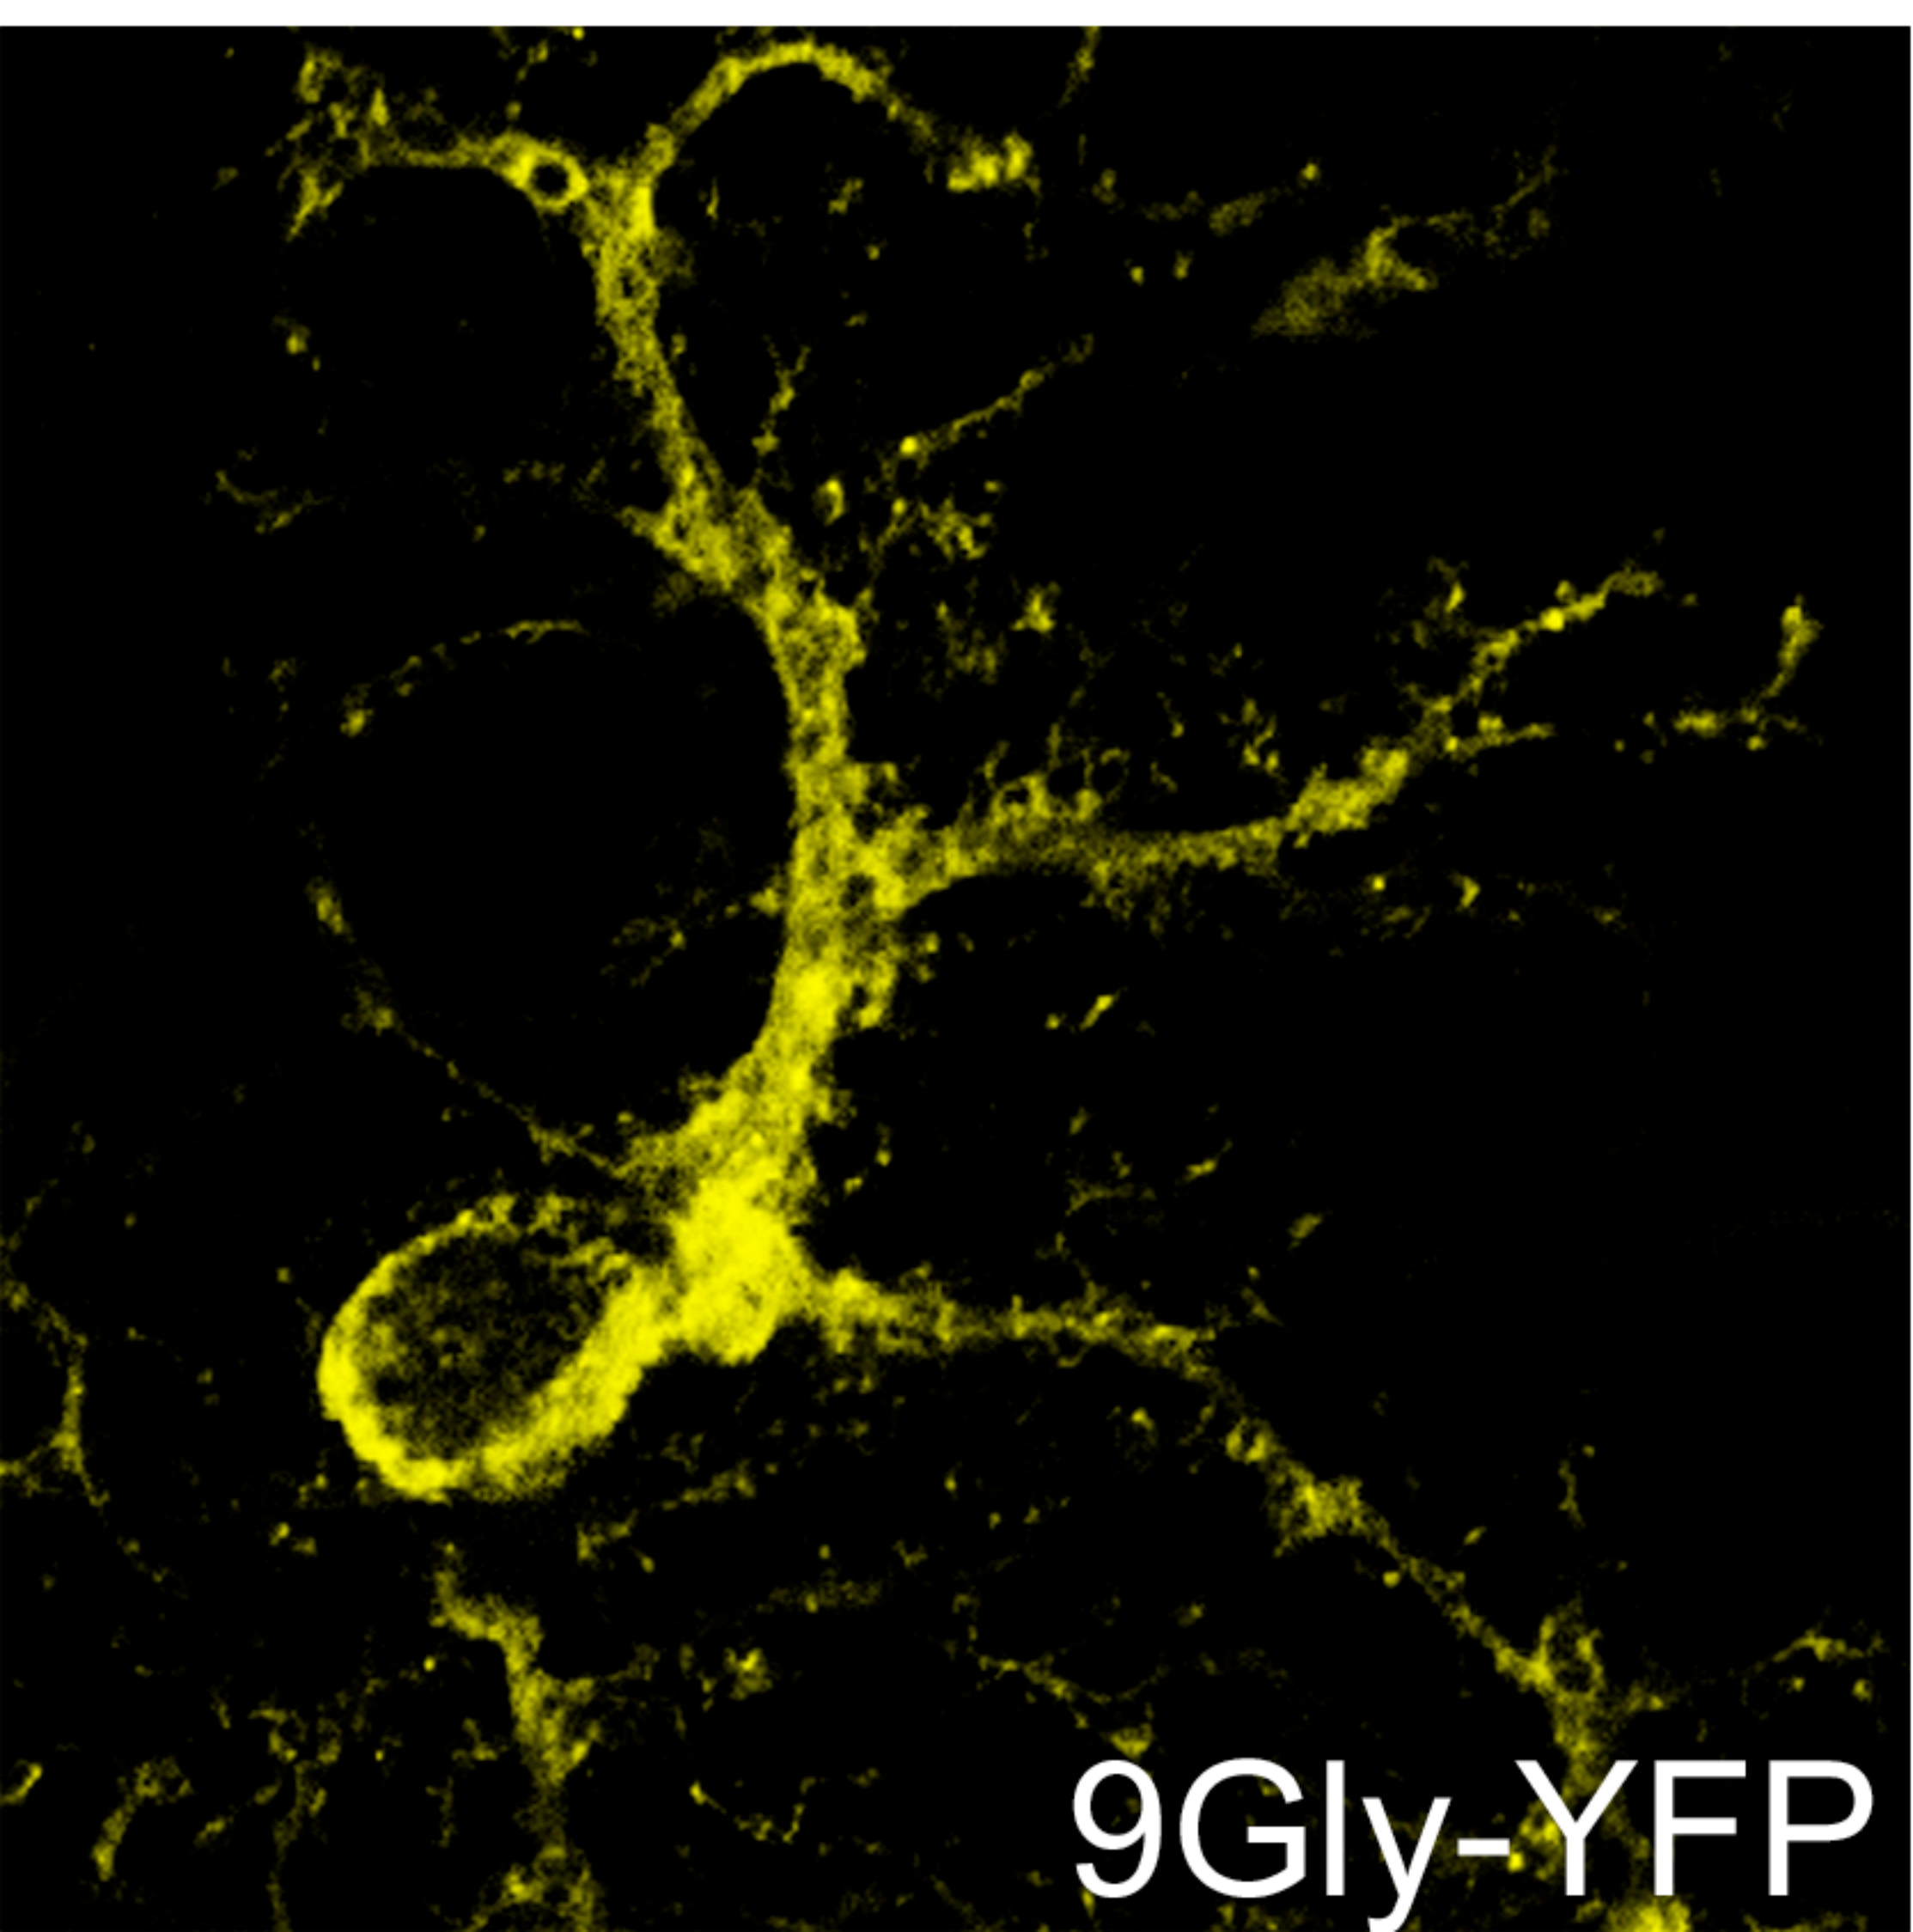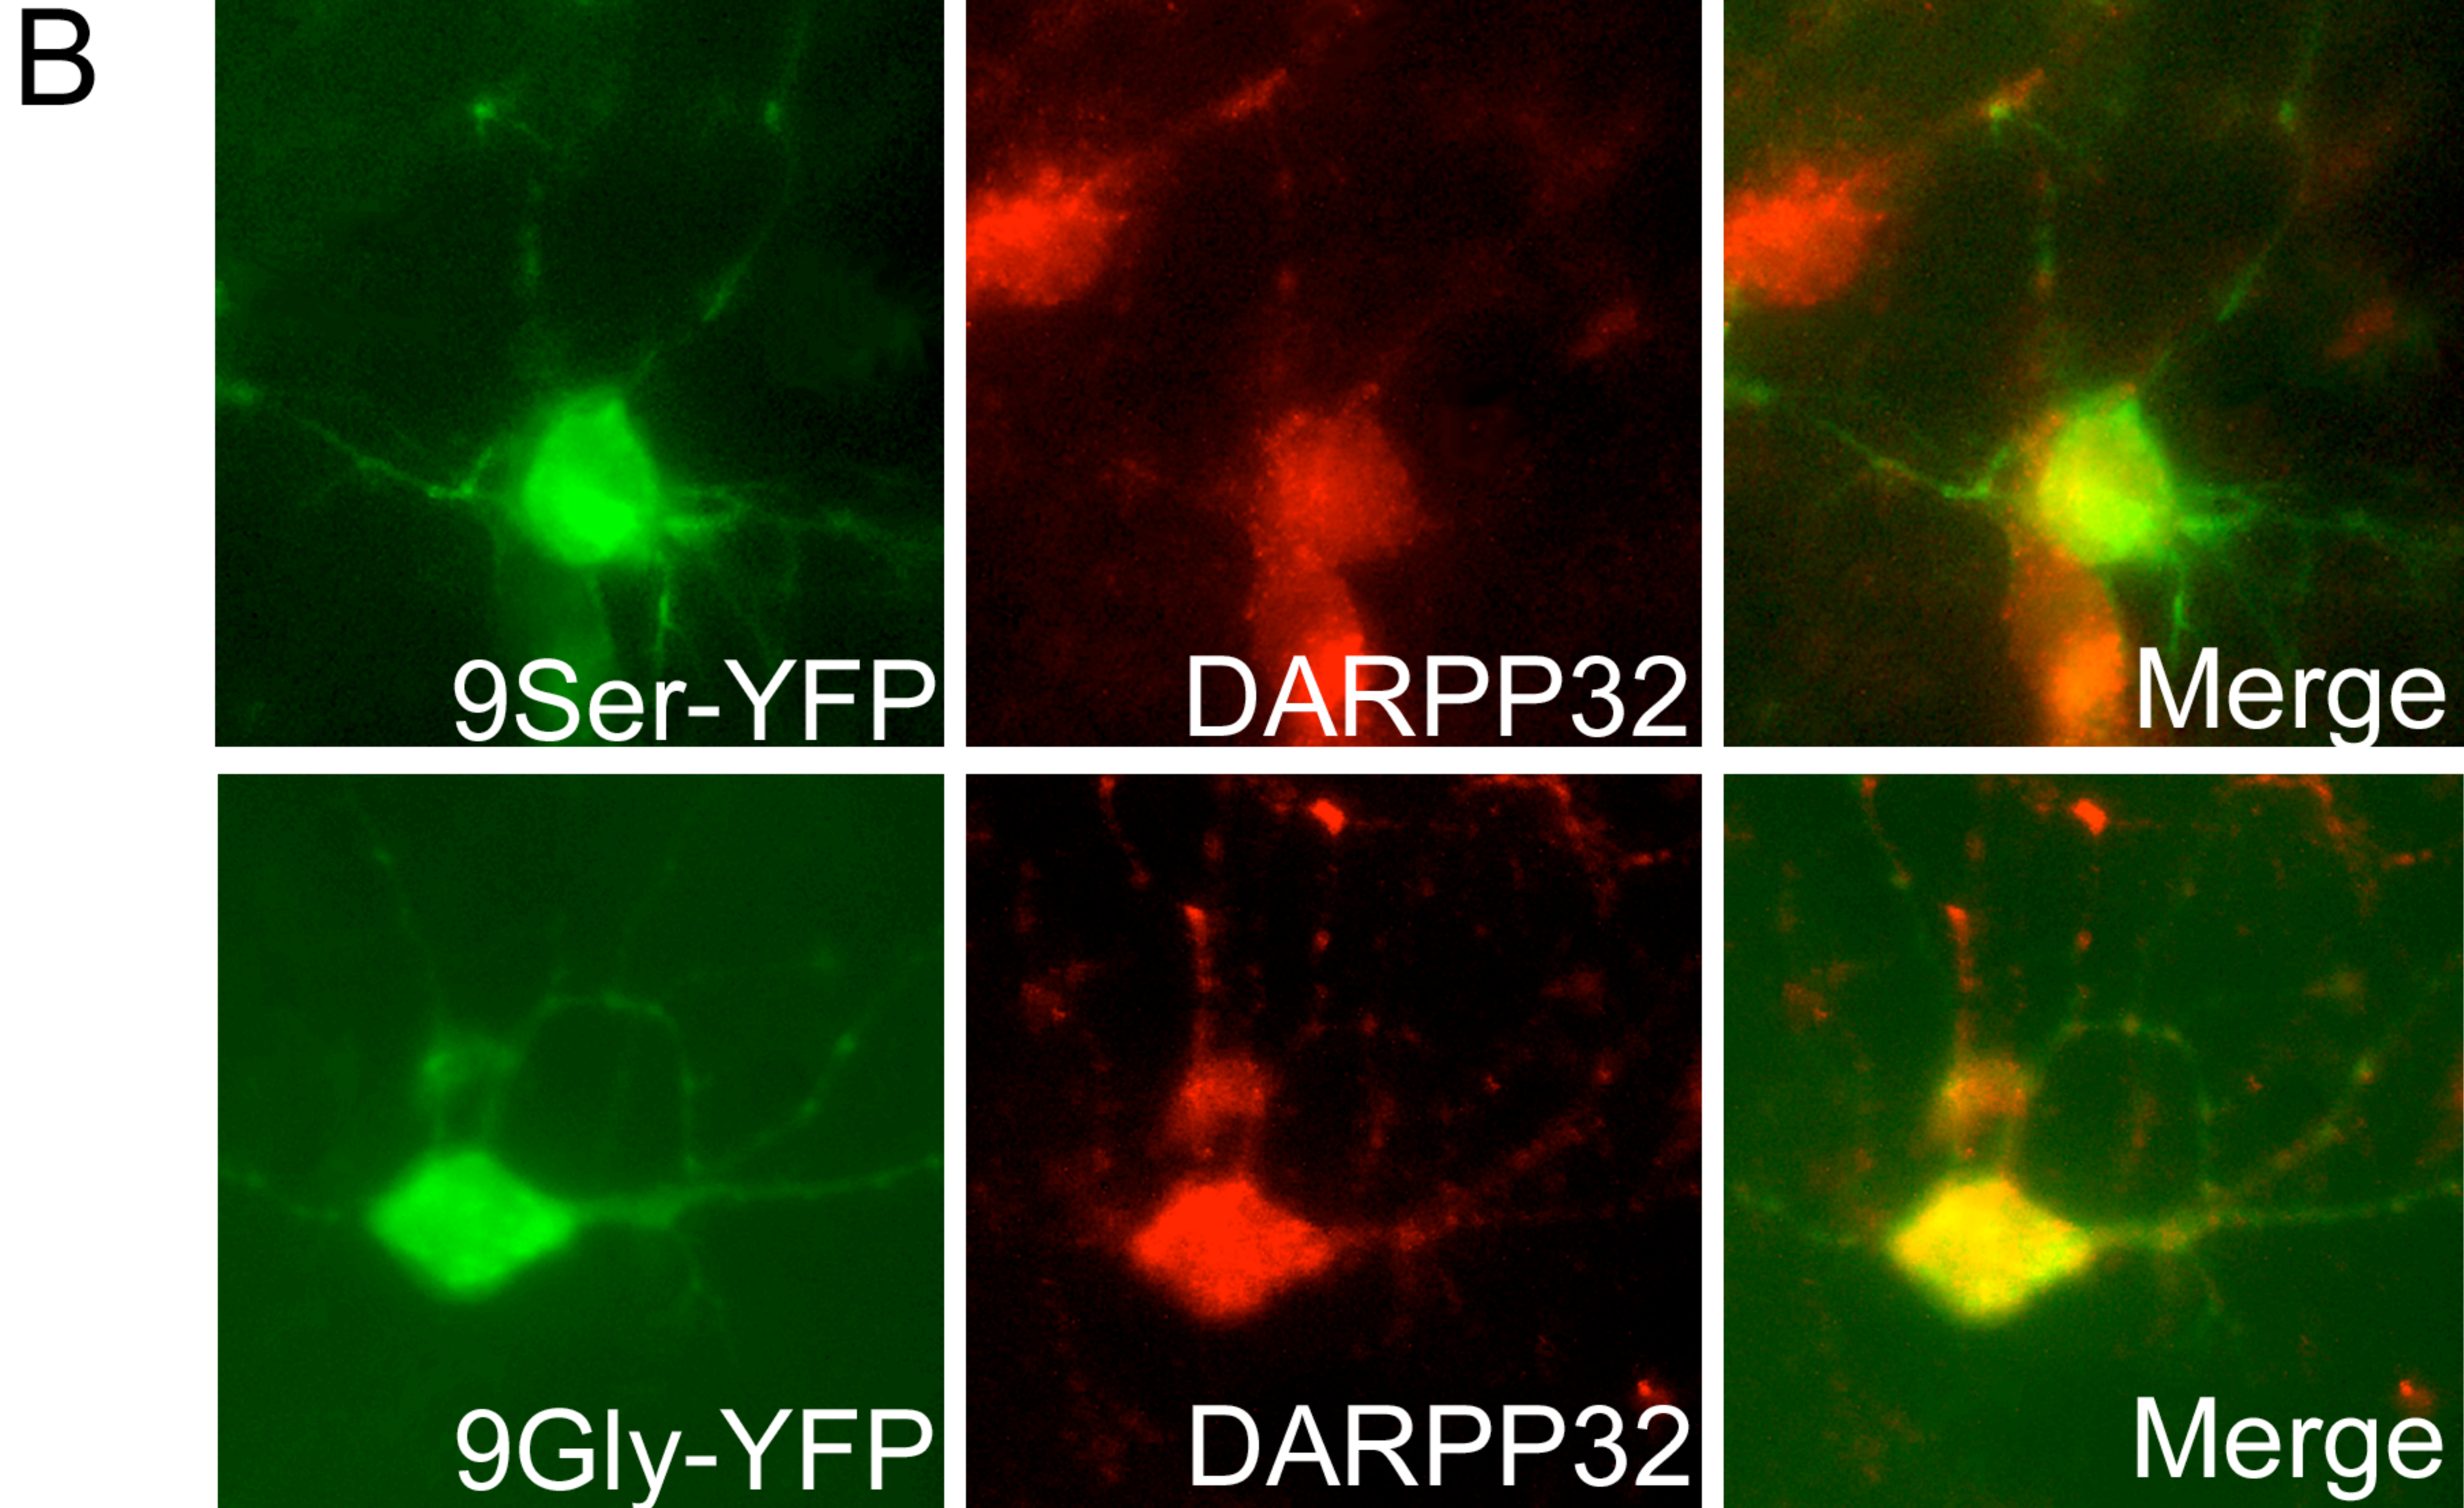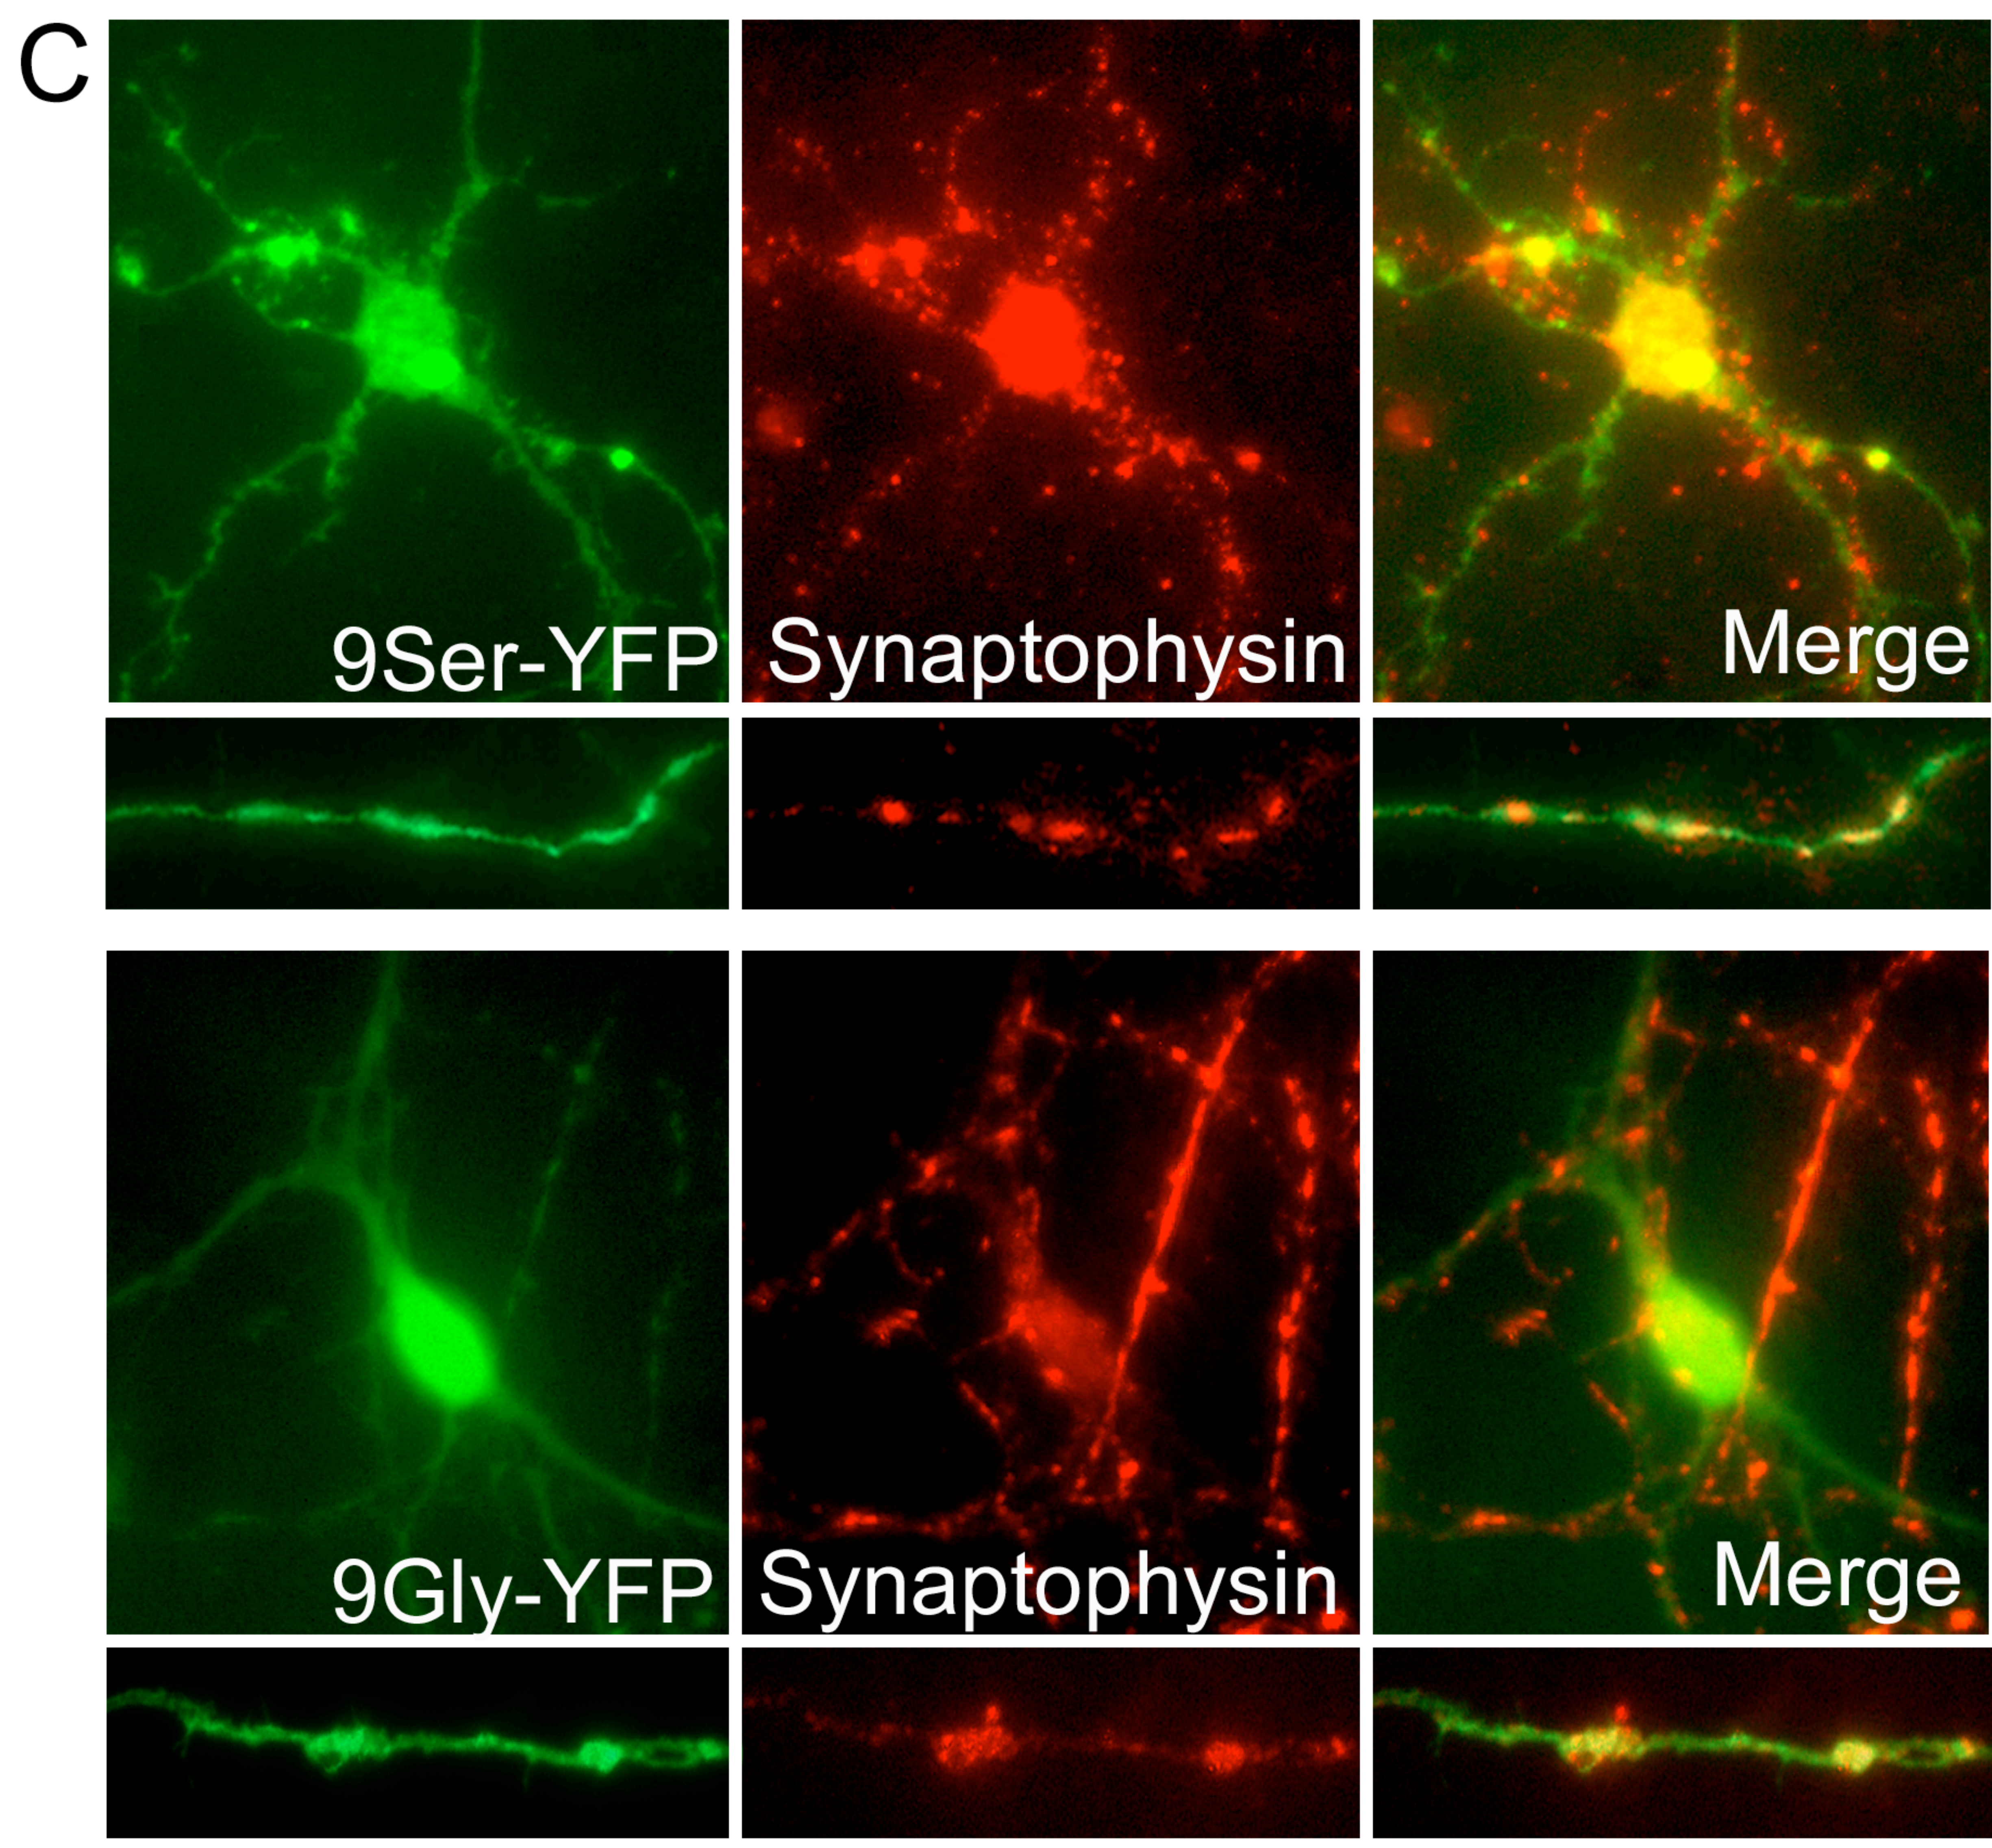

Supplement: pnas_0508189103_1.pdf [file pnas_0508189103_1.pdf]

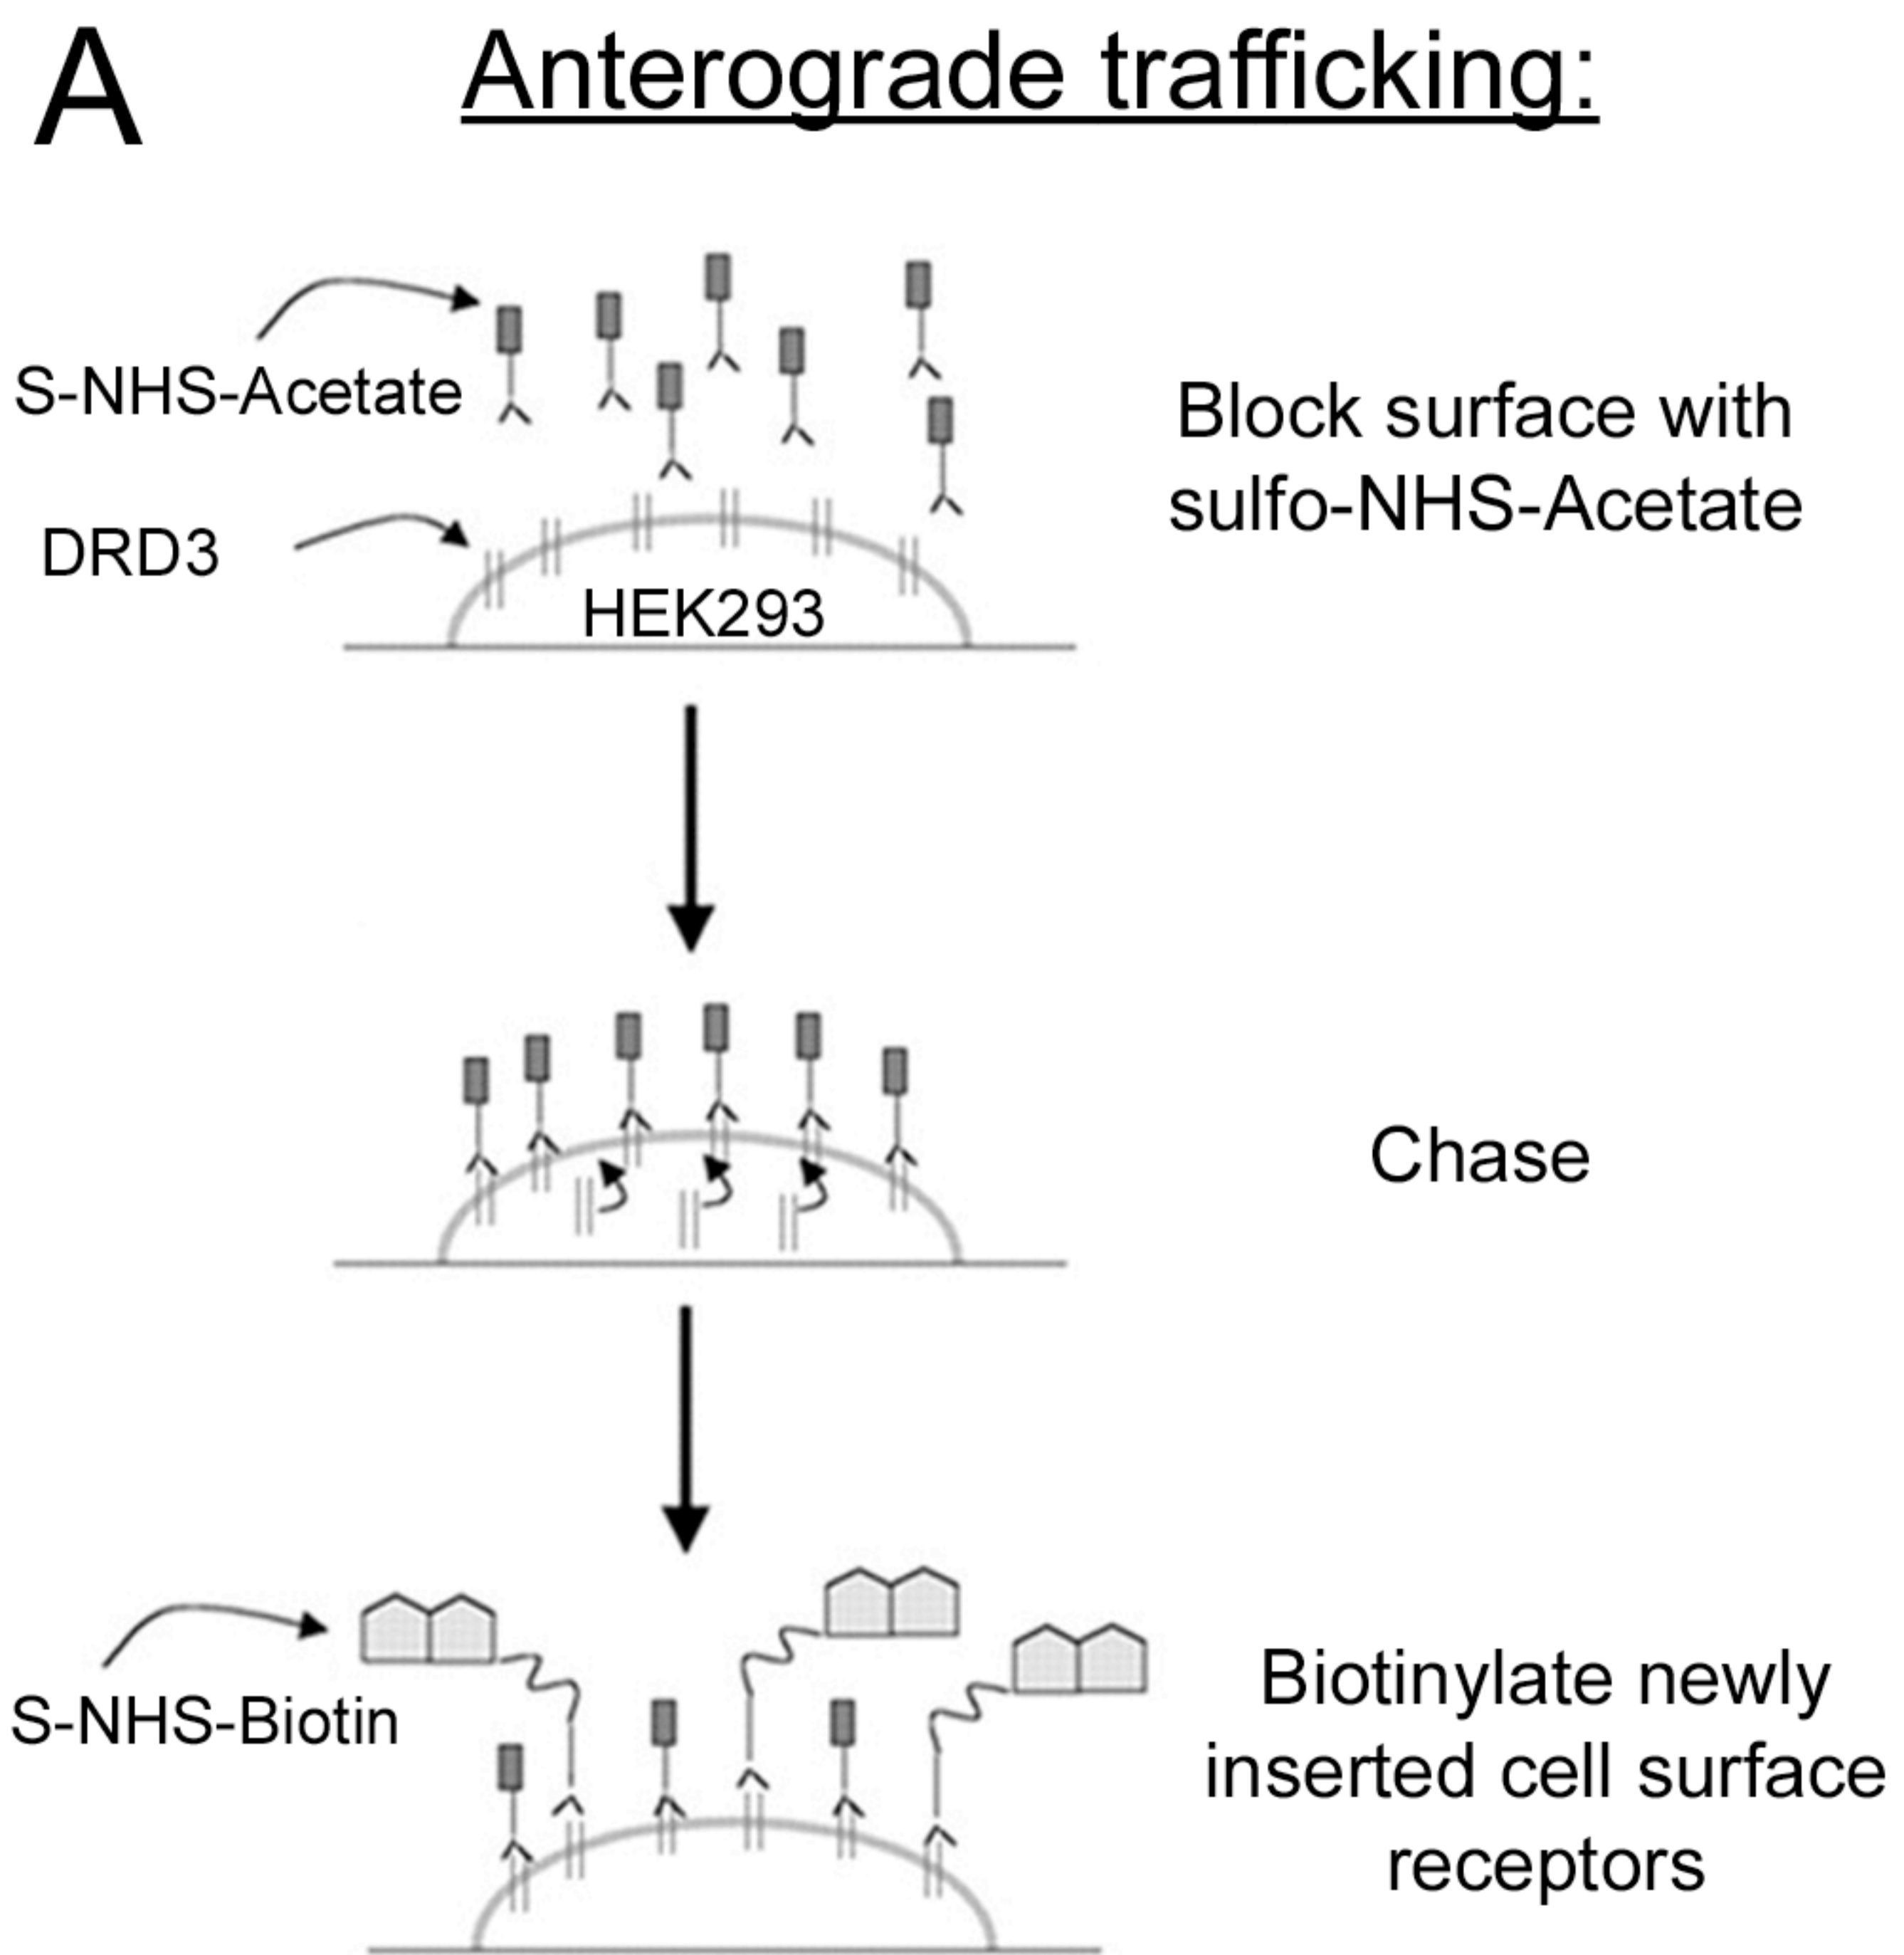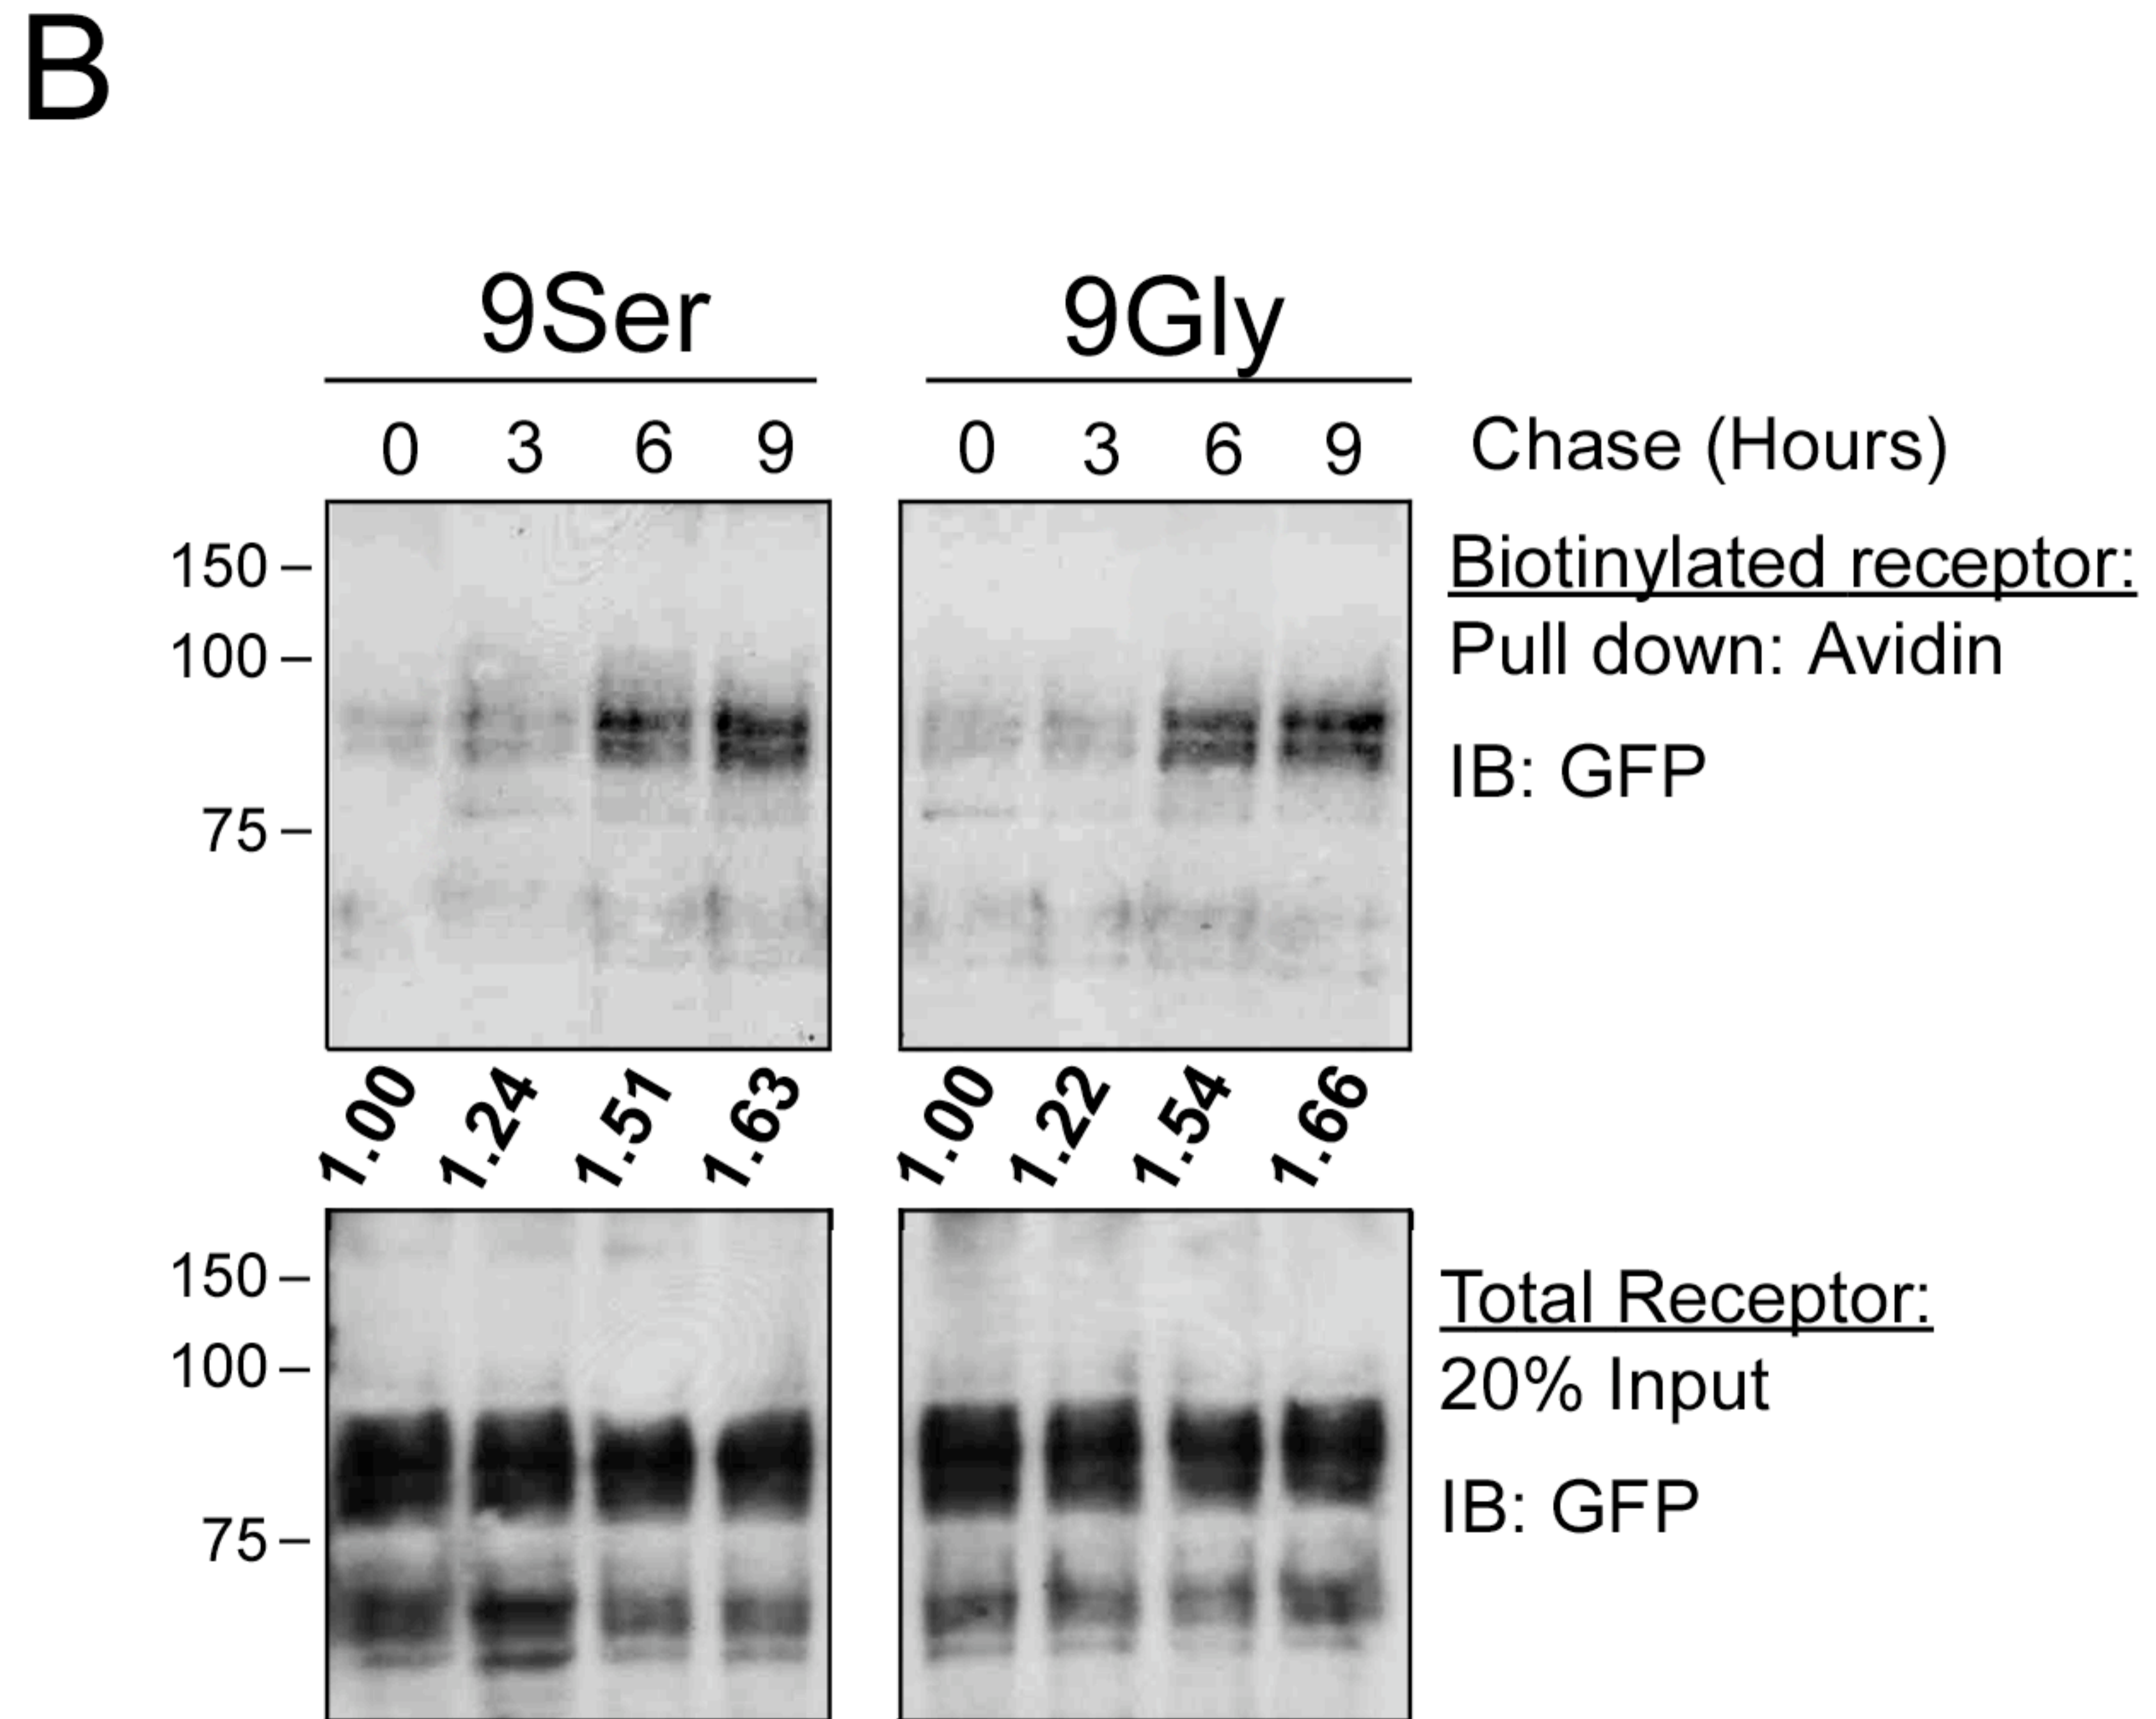

Supplement: pnas_0508189103_2.pdf [file pnas_0508189103_2.pdf]

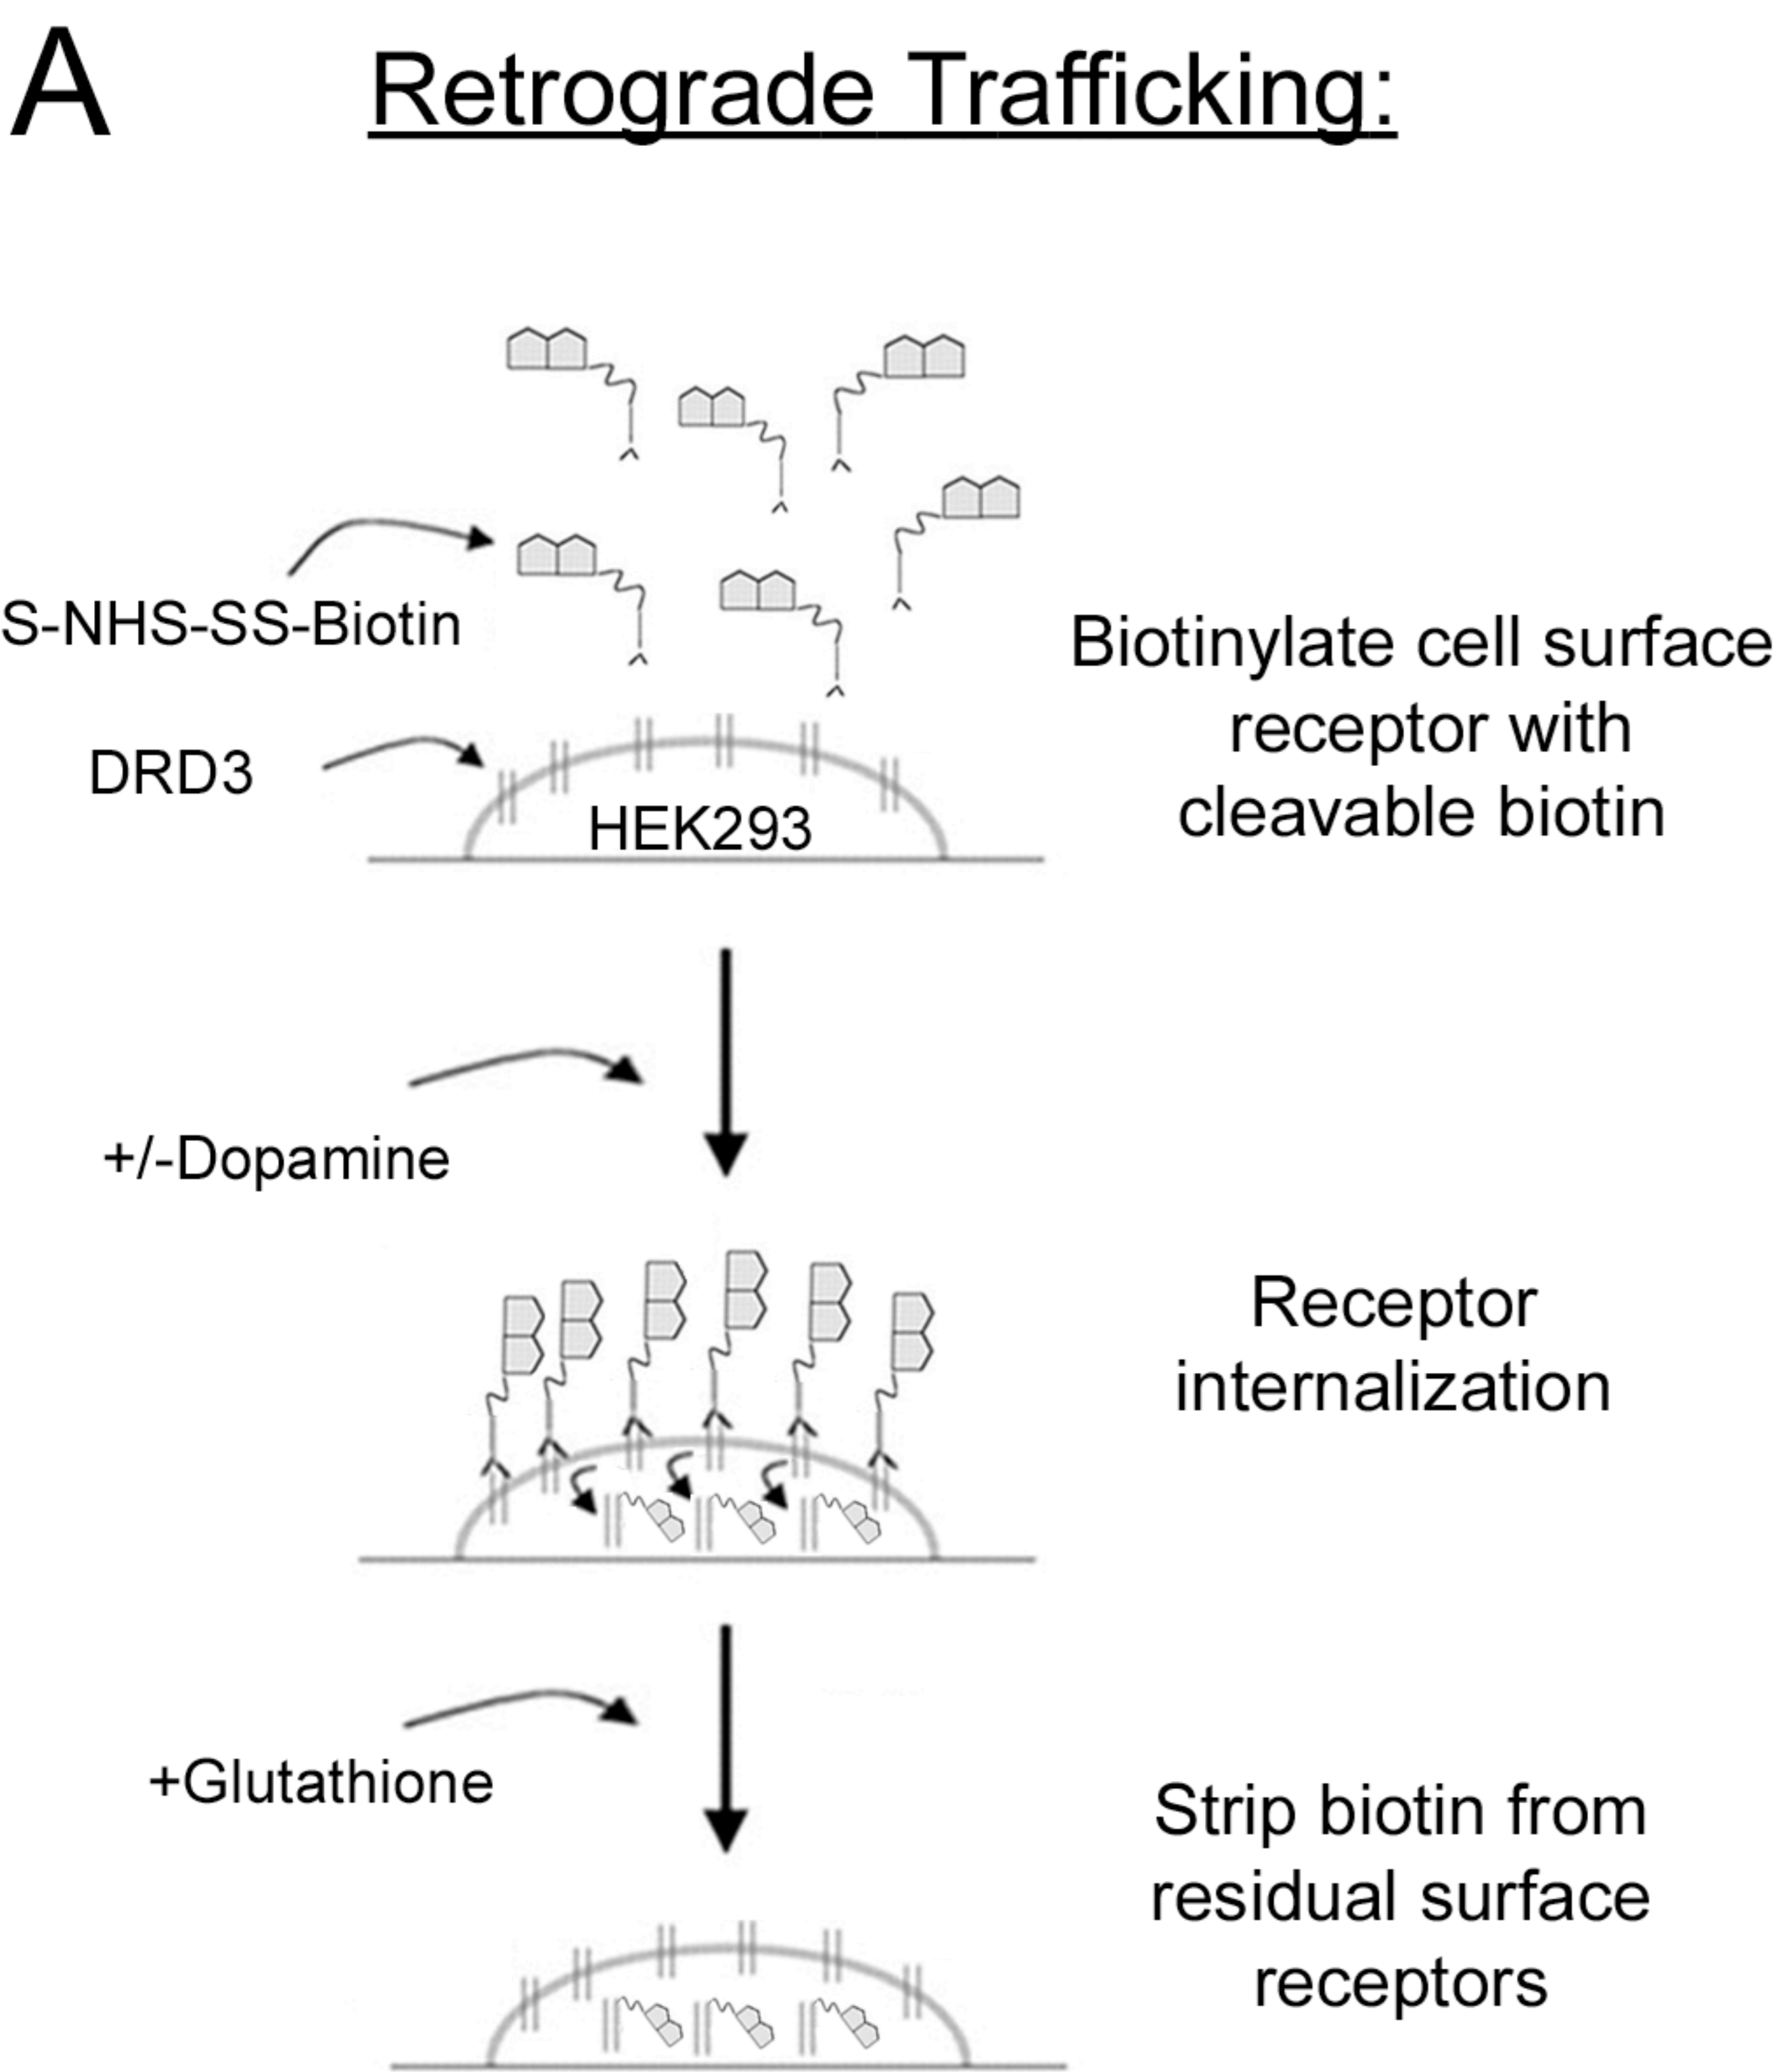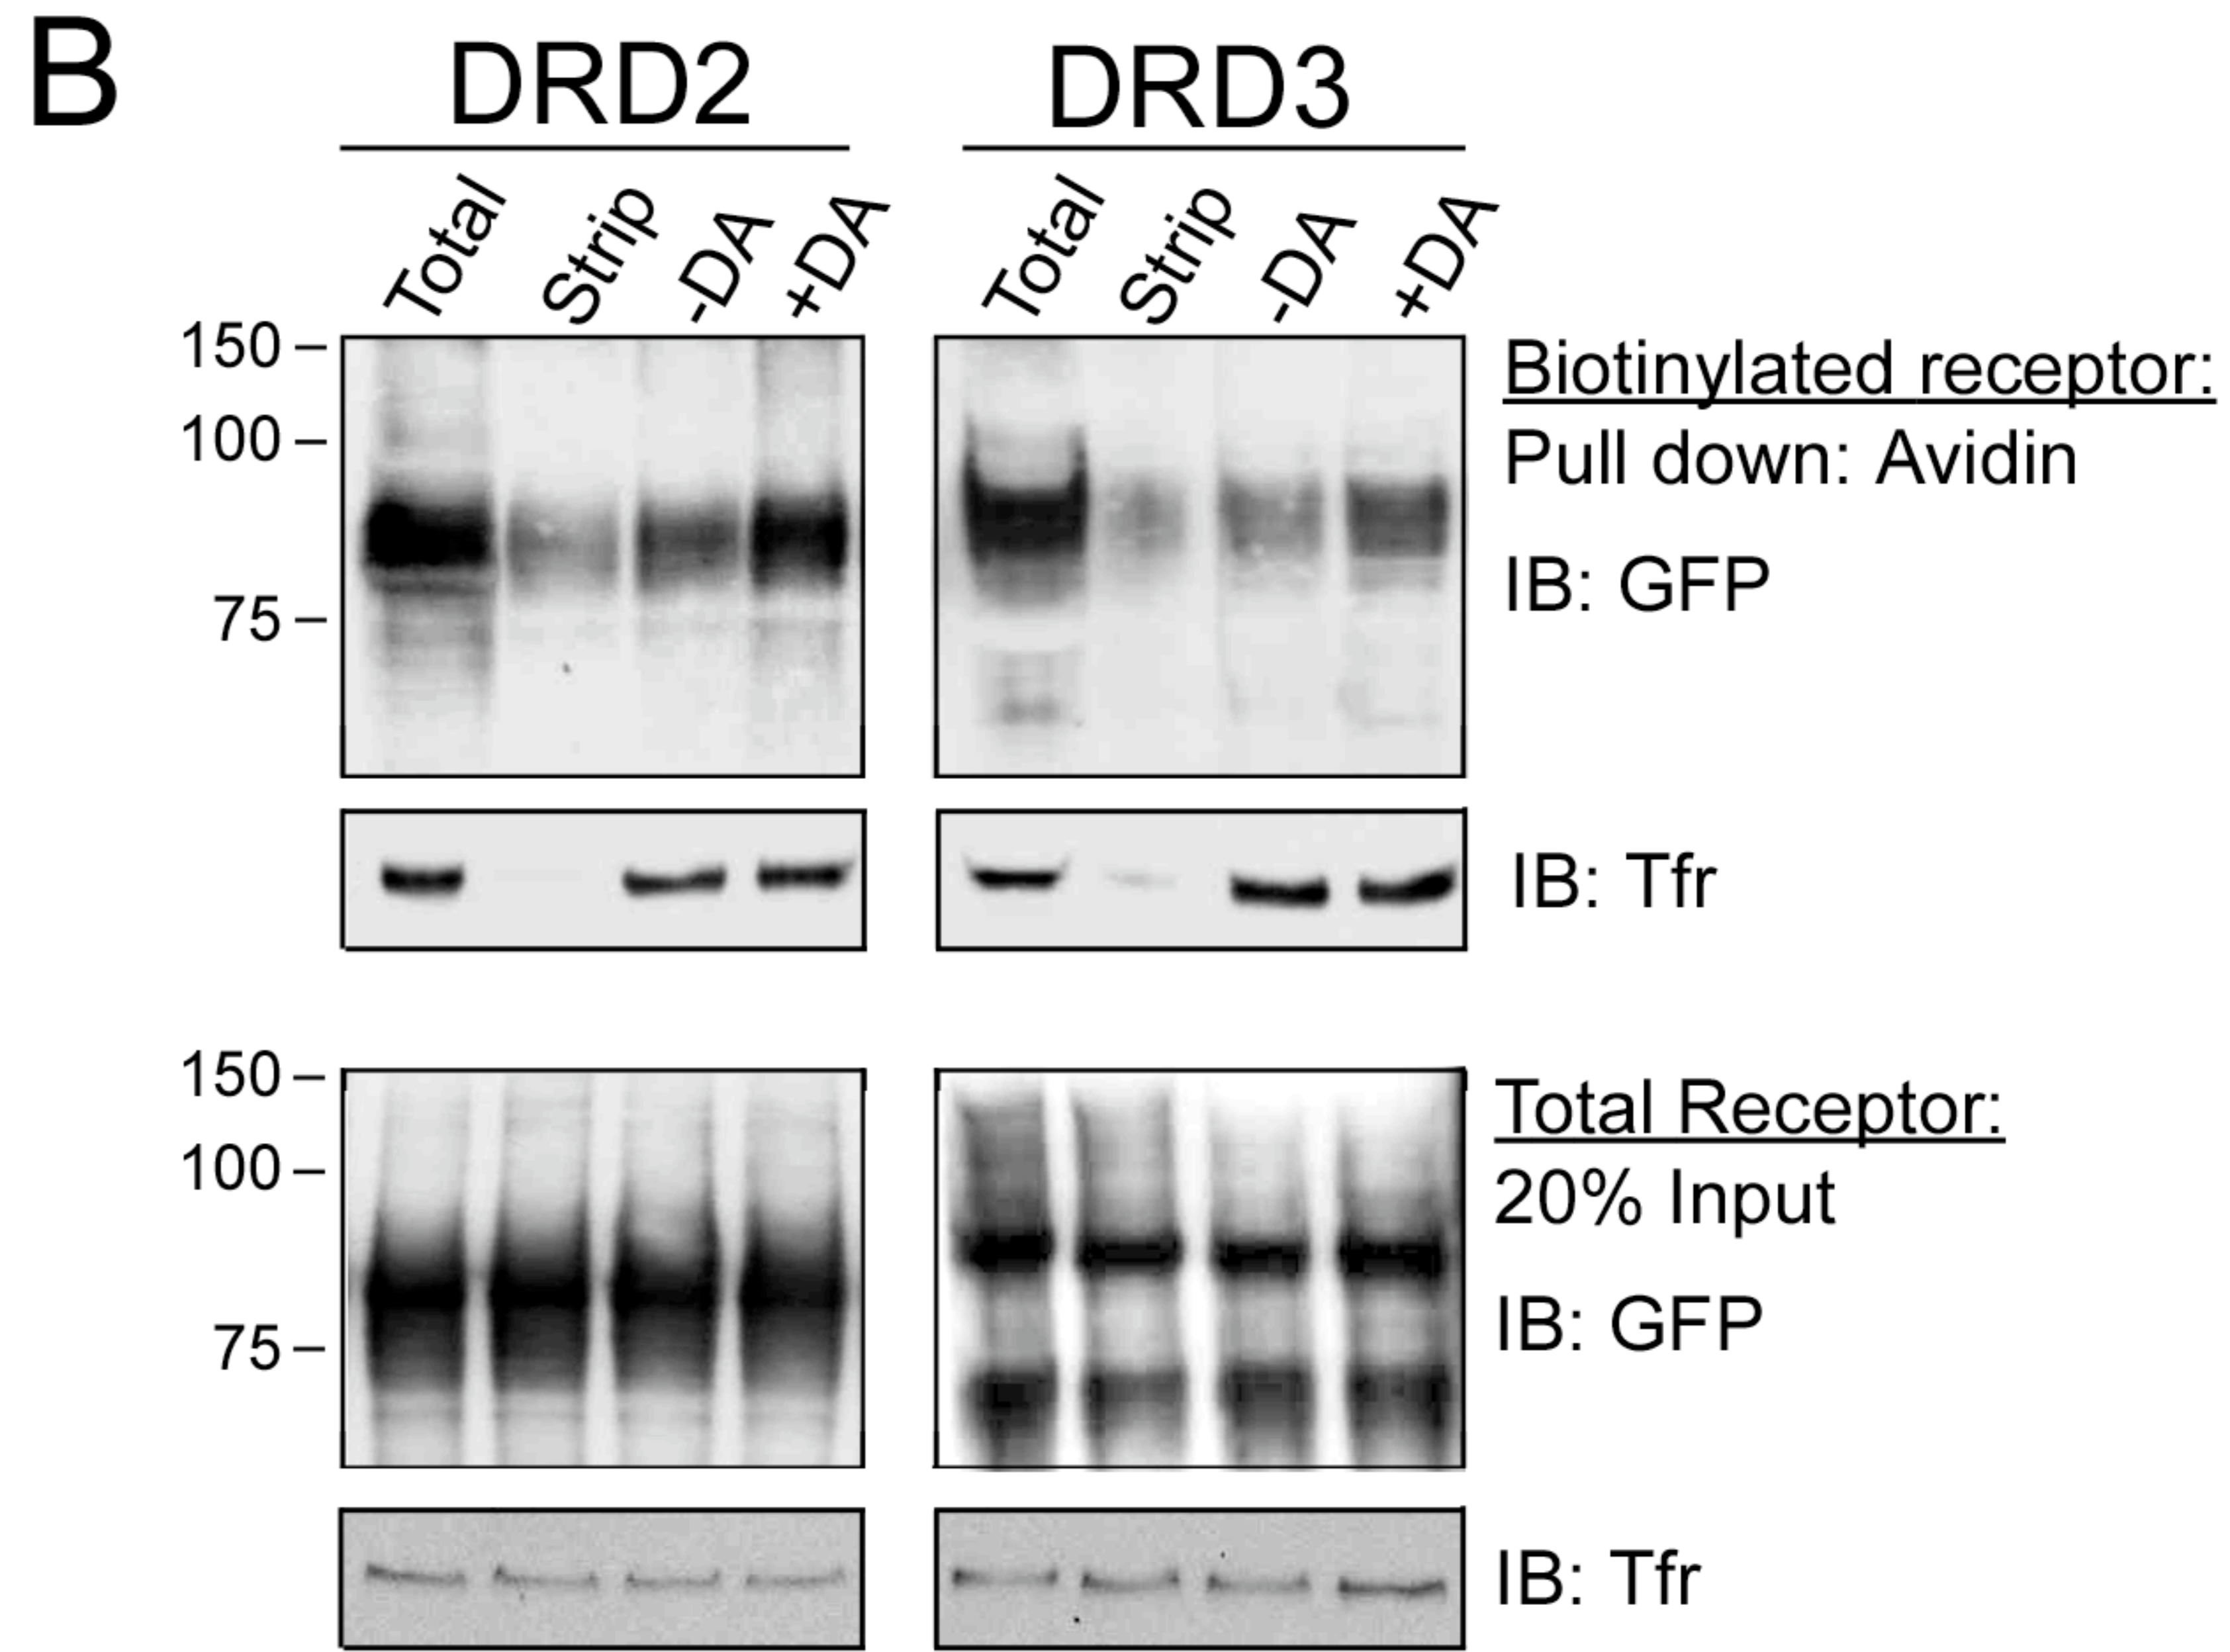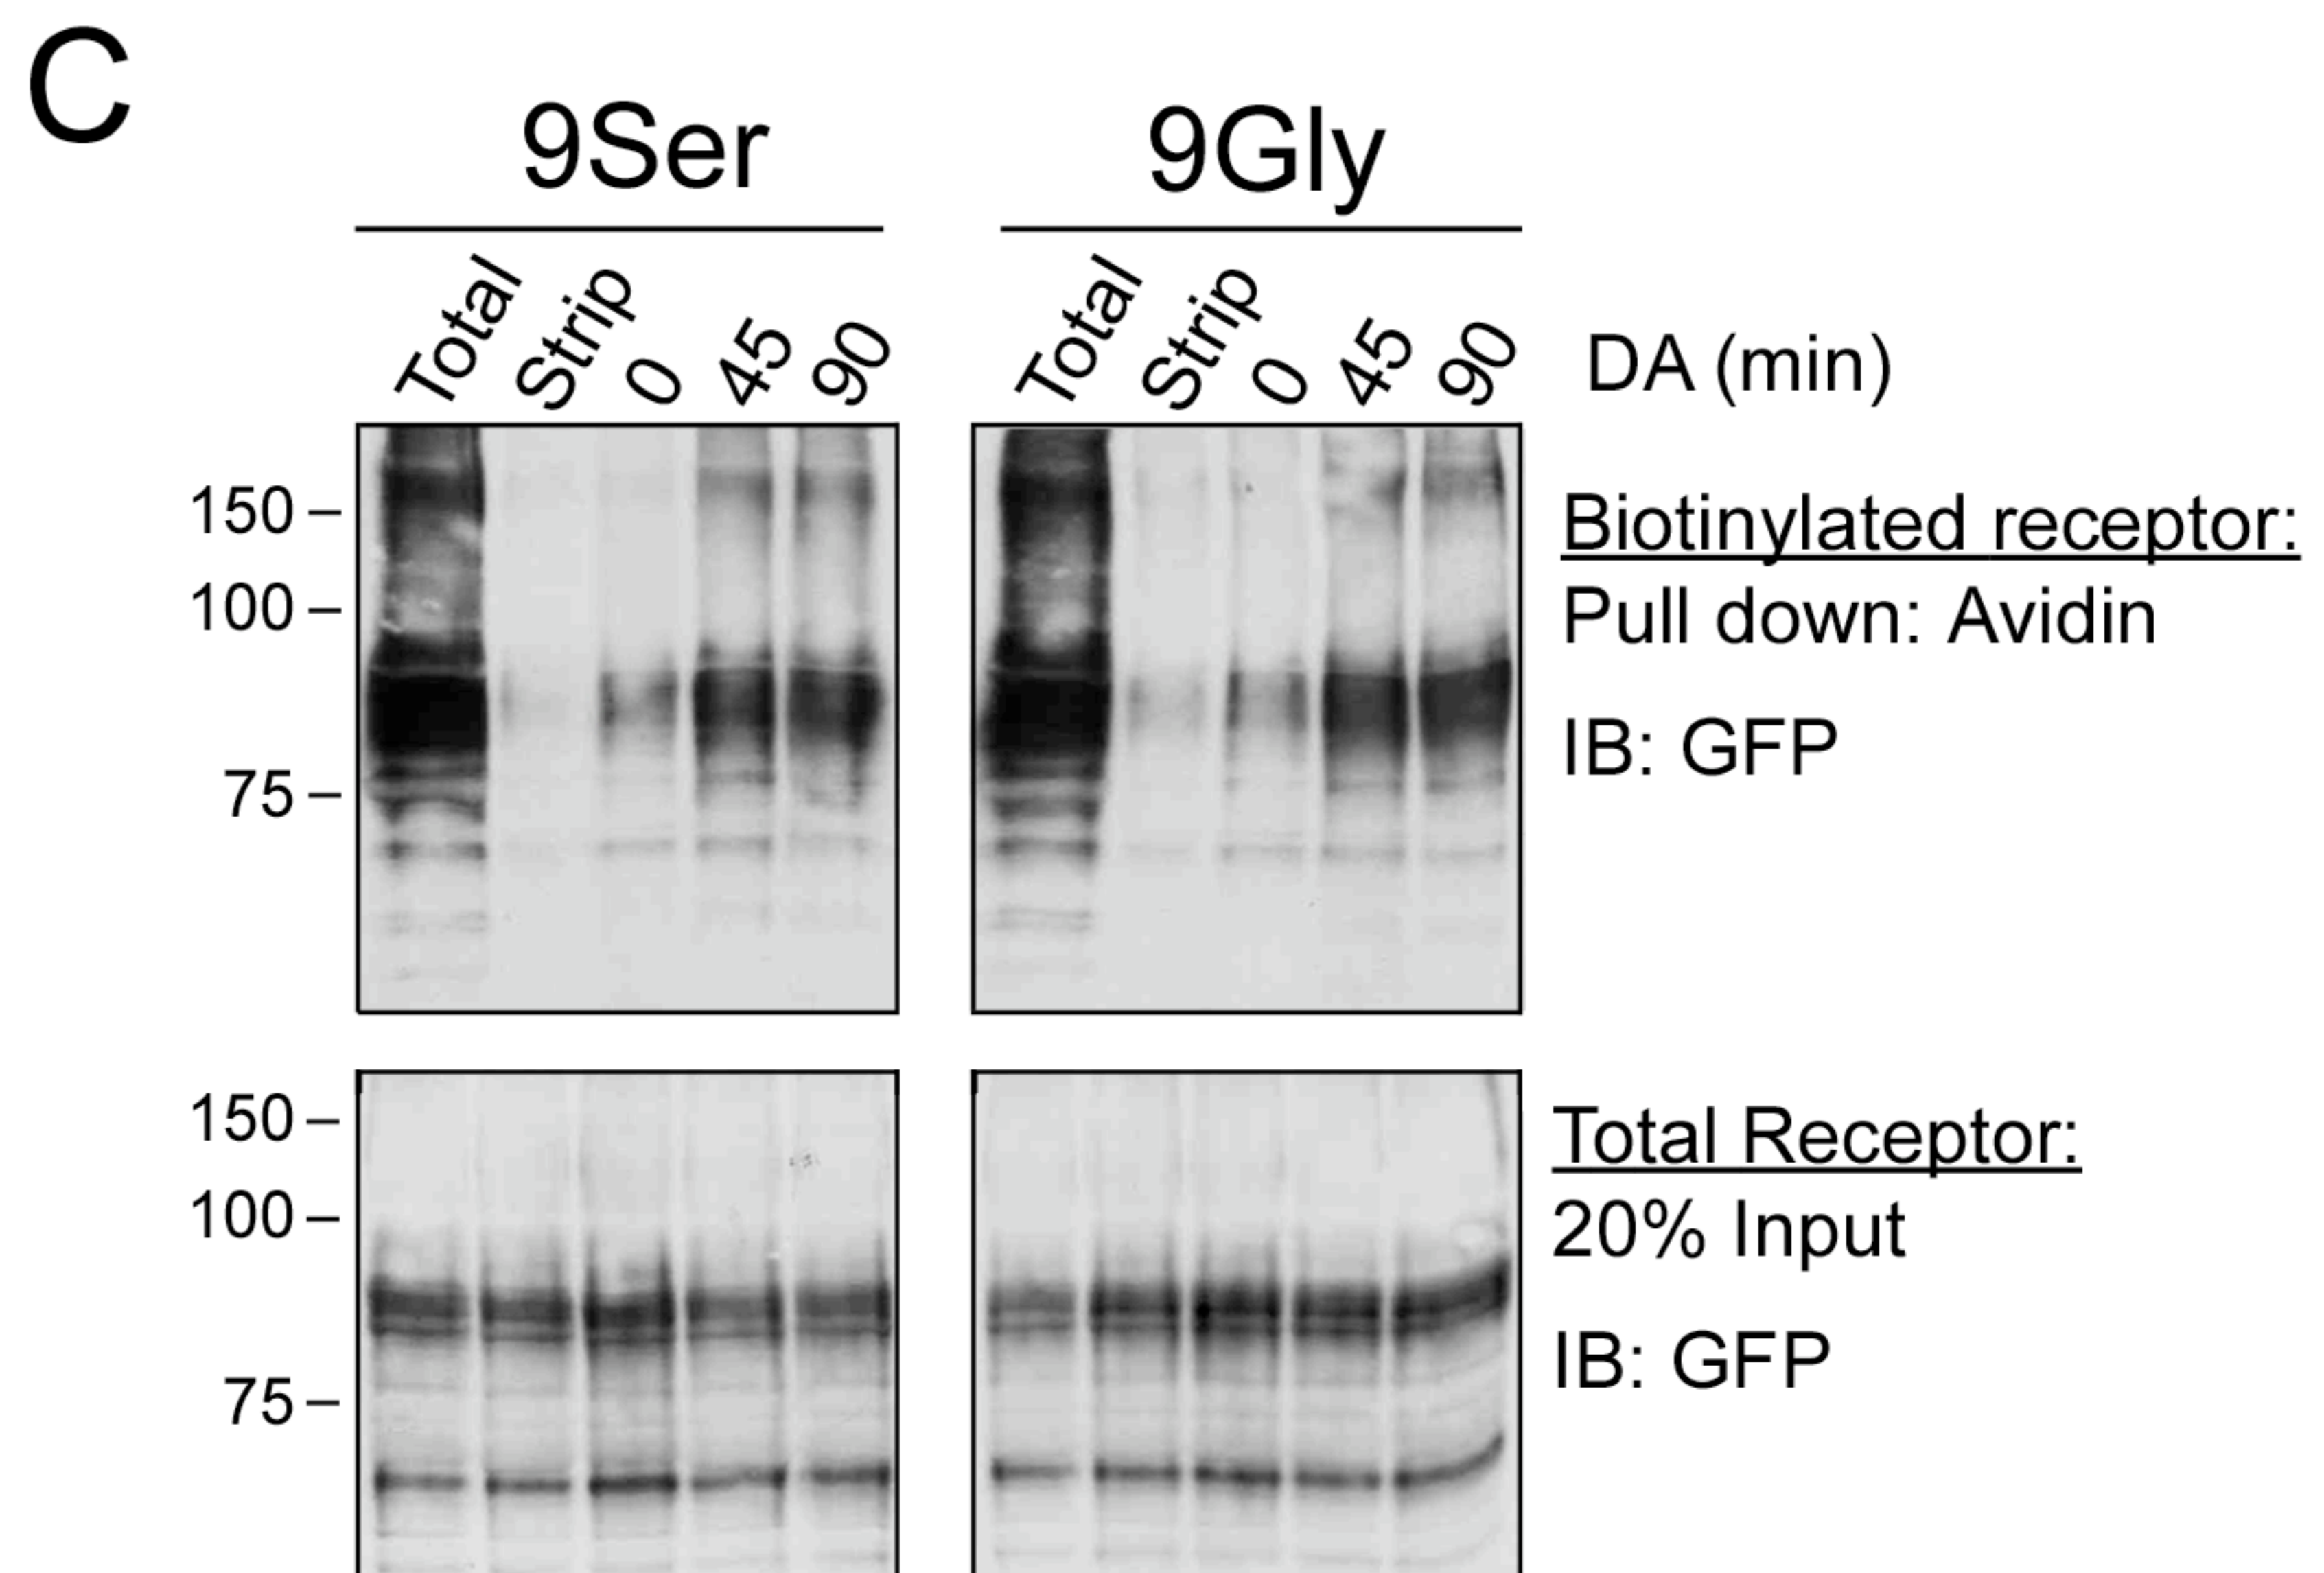

**D**

|               | Internalization (% total) |          |            |
|---------------|---------------------------|----------|------------|
|               | +DA (min): 0              | 45       | 90         |
| DRD2          | 14 ± 5.5                  | n.d.     | 54.6 ± 7.5 |
| DRD3:<br>9Ser | 11.3 ± 2.7                | 19 ± 5.1 | 22 ± 4.3   |
| 9Gly          | 10 ± 5                    | 17 ± 9.3 | 23 ± 6.1   |

Supplement: pnas_0508189103_3.pdf [file pnas_0508189103_3.pdf]
